# Supplementary material for: Regulation of functional groups on graphene quantum dots directs selective CO2 to CH4 conversion
Source: PubMed Central journal article supplement (PMC8421353; doi:10.1038/s41467-021-25640-1), 2021-09-06
Supplement: 41467_2021_25640_MOESM1_ESM.pdf [file 41467_2021_25640_MOESM1_ESM.pdf]

**Regulation of Functional Groups on Graphene Quantum Dots  
Directs Selective CO<sub>2</sub> to CH<sub>4</sub> Conversion**

Tianyu Zhang<sup>1,+</sup>, Weitao Li<sup>2,+</sup>, Kai Huang<sup>3,+</sup>, Huazhang Guo<sup>2</sup>, Zhengyuan Li<sup>1</sup>, Yanbo Fang<sup>4</sup>, Ram Manohar Yadav<sup>5</sup>, Vesselin Shanov<sup>1,4</sup>, Pulickel M. Ajayan<sup>5</sup>, Liang Wang<sup>2\*</sup>, Cheng Lian<sup>3\*</sup>, and Jingjie Wu<sup>1\*</sup>

<sup>1</sup>Department of Chemical and Environmental Engineering, University of Cincinnati, Cincinnati, OH, 45221, United States

<sup>2</sup>Institute of Nanochemistry and Nanobiology, Shanghai University, Shanghai, 200444, P. R. China

<sup>3</sup>State Key Laboratory of Chemical Engineering, School of Chemical Engineering, East China University of Science and Technology, Shanghai, 200237, P. R. China

<sup>4</sup>Department of Mechanical and Materials Engineering, University of Cincinnati, Cincinnati, OH, 45221, United States

<sup>5</sup>Department of Materials Science and NanoEngineering, Rice University, Houston, TX, 77005, United States

<sup>+</sup>These authors contributed equally.

\*Corresponding authors: [wangl@shu.edu.cn](mailto:wangl@shu.edu.cn); [lian Cheng@ecust.edu.cn](mailto:lian Cheng@ecust.edu.cn); [jingjie.wu@uc.edu](mailto:jingjie.wu@uc.edu)

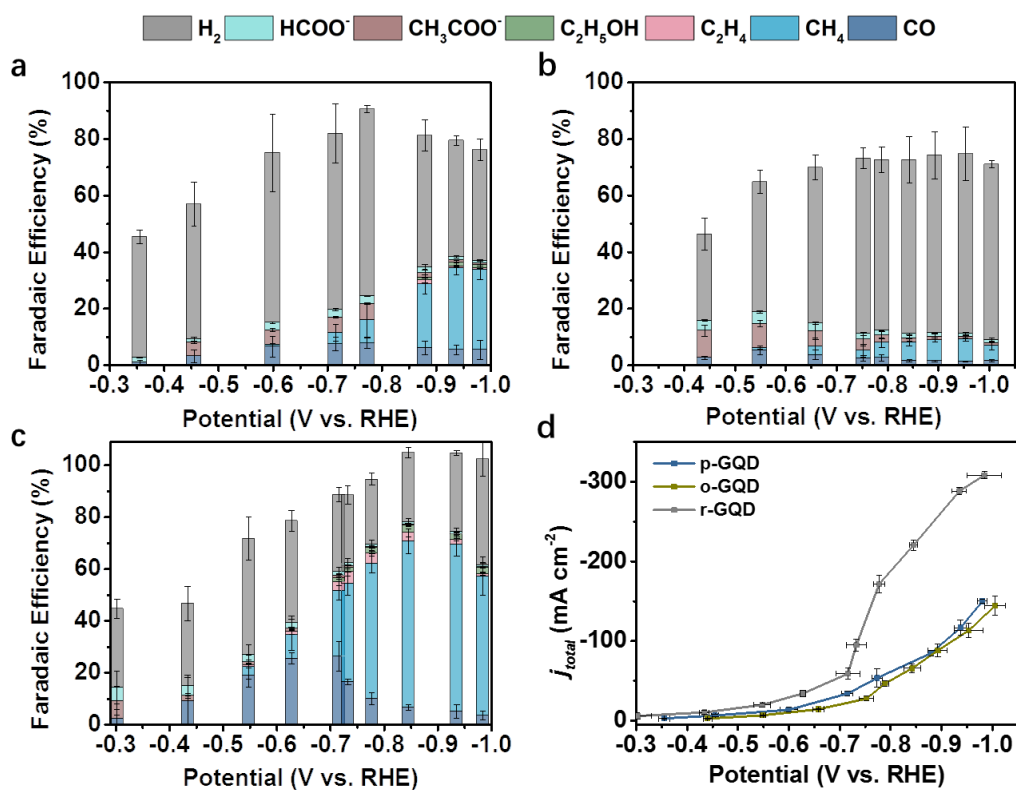

**Supplementary Figure 1.** Faradaic efficiency of all products of CO<sub>2</sub> reduction as a function of the applied potential on (a) p-GQDs, (b) o-GQDs, and (c) r-GQDs. (d) The  $j_{total}$  of CO<sub>2</sub> reduction for the p-, o-, and r-GQDs. The error bars represent the standard deviation from the measurements of three independent samples.

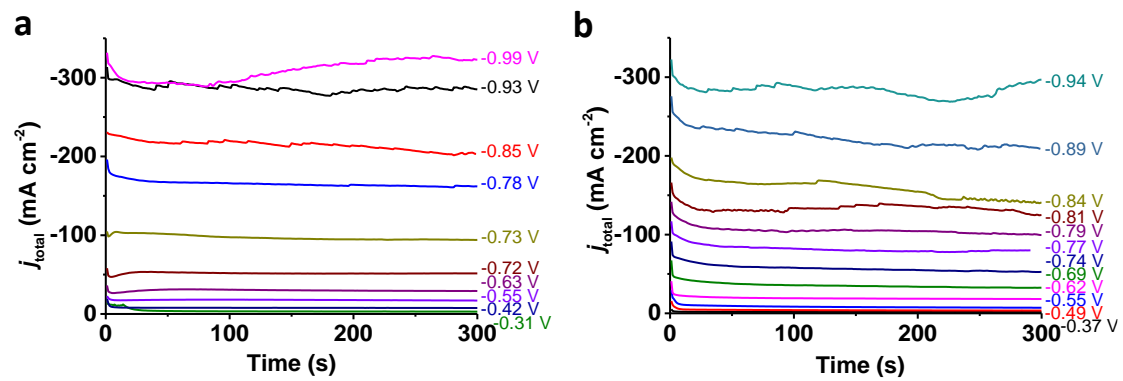

**Supplementary Figure 2.** The  $j$ - $t$  curve of each applied cathode potential for (a) r-GQDs, and (b) GQD-NH<sub>2</sub>-H.

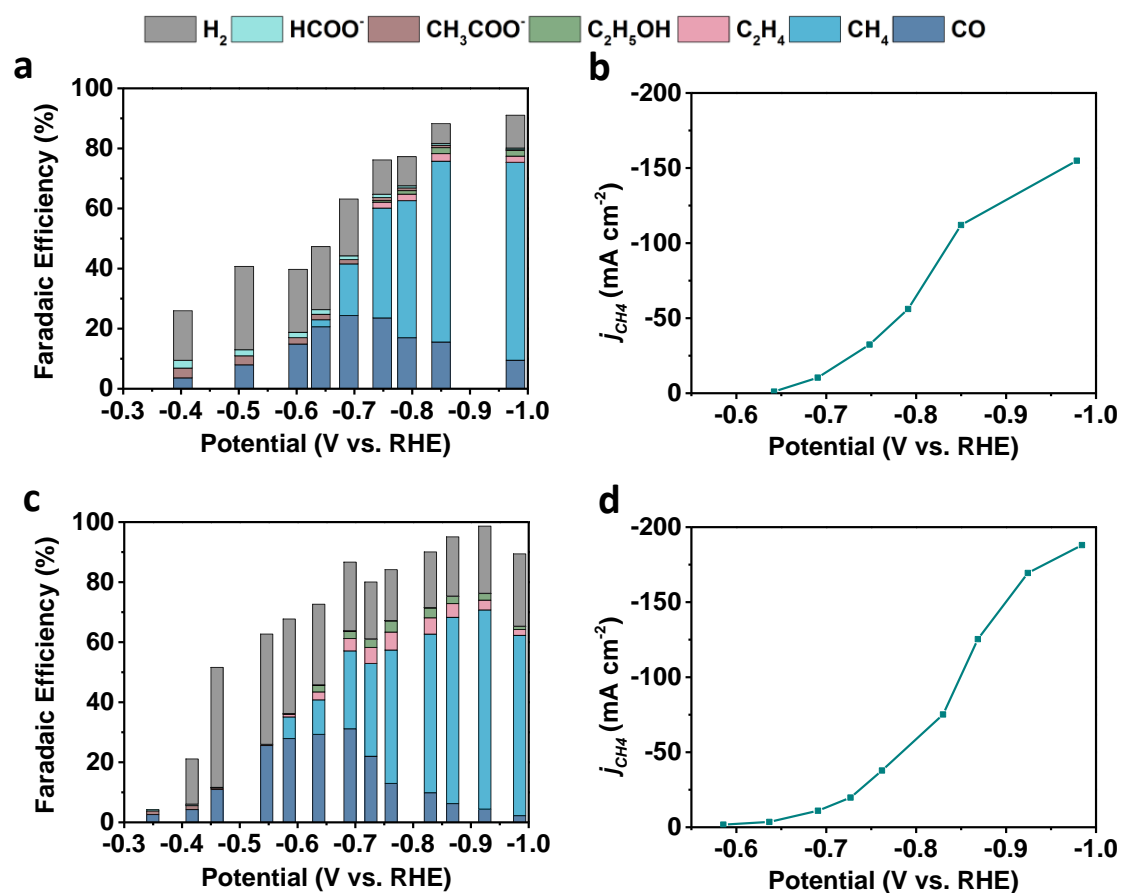

**Supplementary Figure 3.** (a and c) Faradaic efficiency of  $CO_2$  reduction products as a function of the applied potential on the (a) clean-r-GQDs and (c) clean-GQD-NH<sub>2</sub>-H with Cu concentration under the detection limit of ICP-MS. (b and d) The  $j_{CH_4}$  of  $CO_2$  reduction for the (b) clean-r-GQDs and (d) clean-GQD-NH<sub>2</sub>-H. The test was conducted in a high purity electrolyte of 1 M KOH (semiconductor grade, 99.99% trace metals basis).

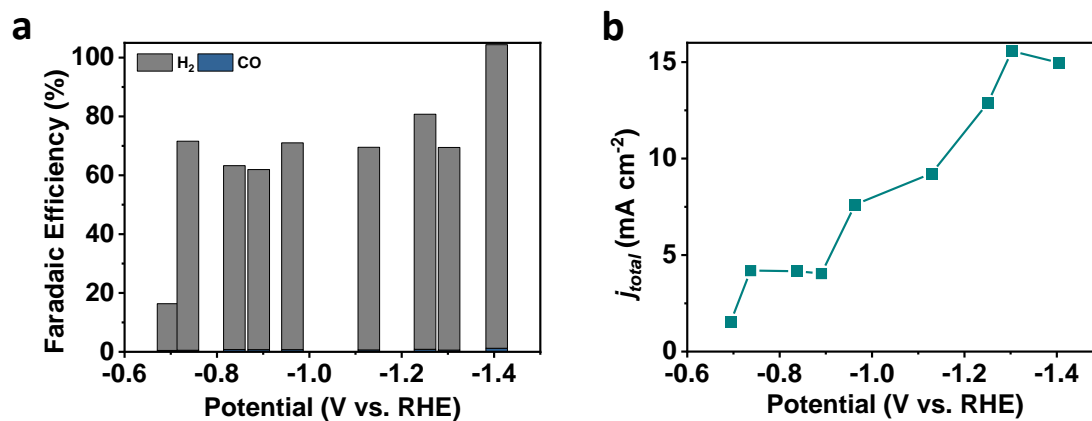

**Supplementary Figure 4.** (a) Faradaic efficiency of CO<sub>2</sub> reduction products as a function of the applied potential on the GDL (Sigracet 39BB, Cu content: 1.9  $\mu\text{g g}^{-1}$  (ppm)). (b) The  $j_{total}$  of CO<sub>2</sub> reduction. The test was conducted in a high purity electrolyte of 1 M KOH (semiconductor grade, 99.99% trace metals basis).

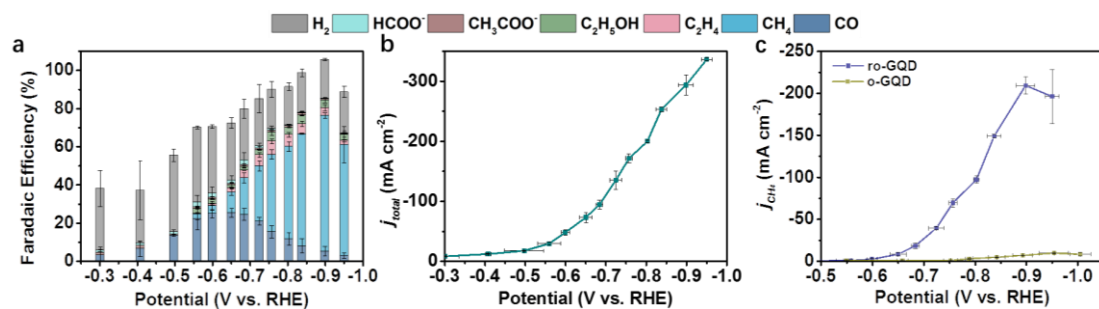

**Supplementary Figure 5.** (a) The Faradaic efficiency of all products of CO<sub>2</sub> reduction as a function of the applied potential on ro-GQDs. (b) The  $j_{total}$  of CO<sub>2</sub> reduction for the ro-GQDs. (c) The comparison of the  $j_{CH_4}$  between the o-GQDs and the ro-GQDs. The error bars represent the standard deviation from the measurements of three independent samples.

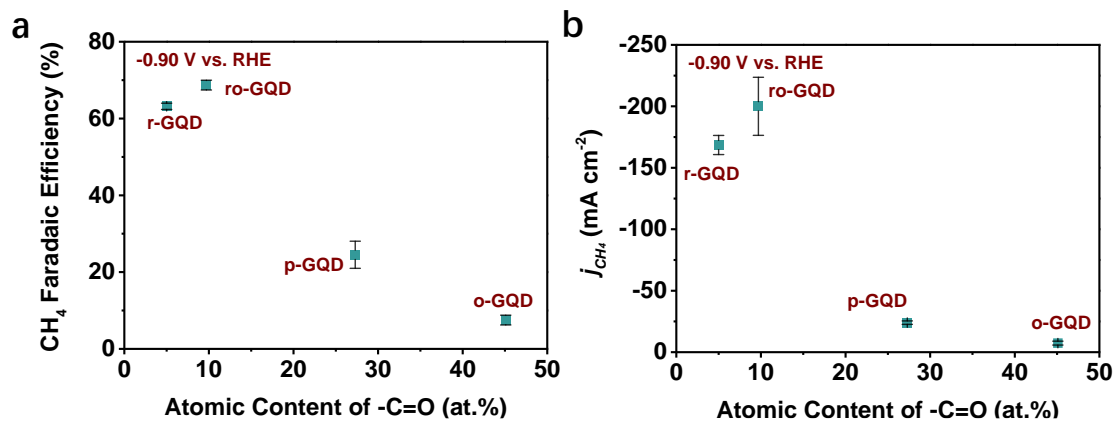

**Supplementary Figure 6.** The relationship between (a) the CH<sub>4</sub> Faradaic efficiency and (b) the  $j_{CH_4}$ , and the atomic content of -C=O functionalities including carbonyl and carboxyl groups. The error bars represent the standard deviation from the measurements of three independent samples.

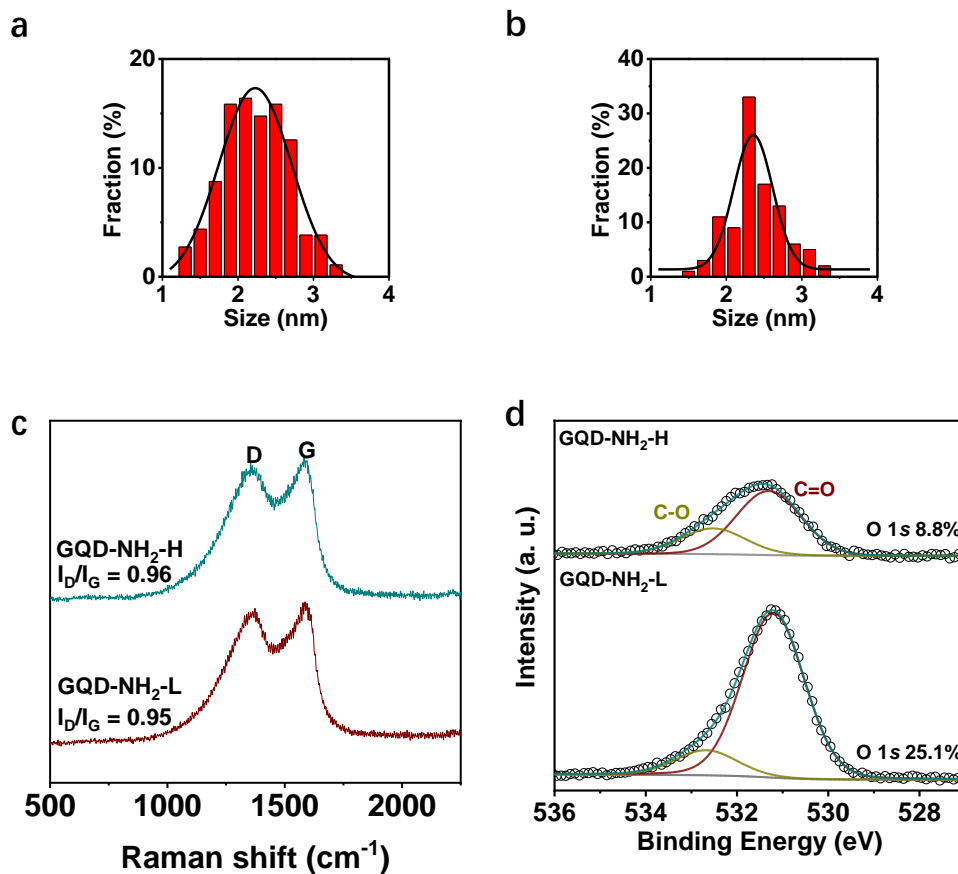

**Supplementary Figure 7.** The lateral size distribution of (a) GQD-NH<sub>2</sub>-L and (b) GQD-NH<sub>2</sub>-H. (c) The Raman spectra of GQD-NH<sub>2</sub>-H and GQD-NH<sub>2</sub>-L. (d) The high-resolution O 1s spectra of GQD-NH<sub>2</sub>-H and GQD-NH<sub>2</sub>-L.



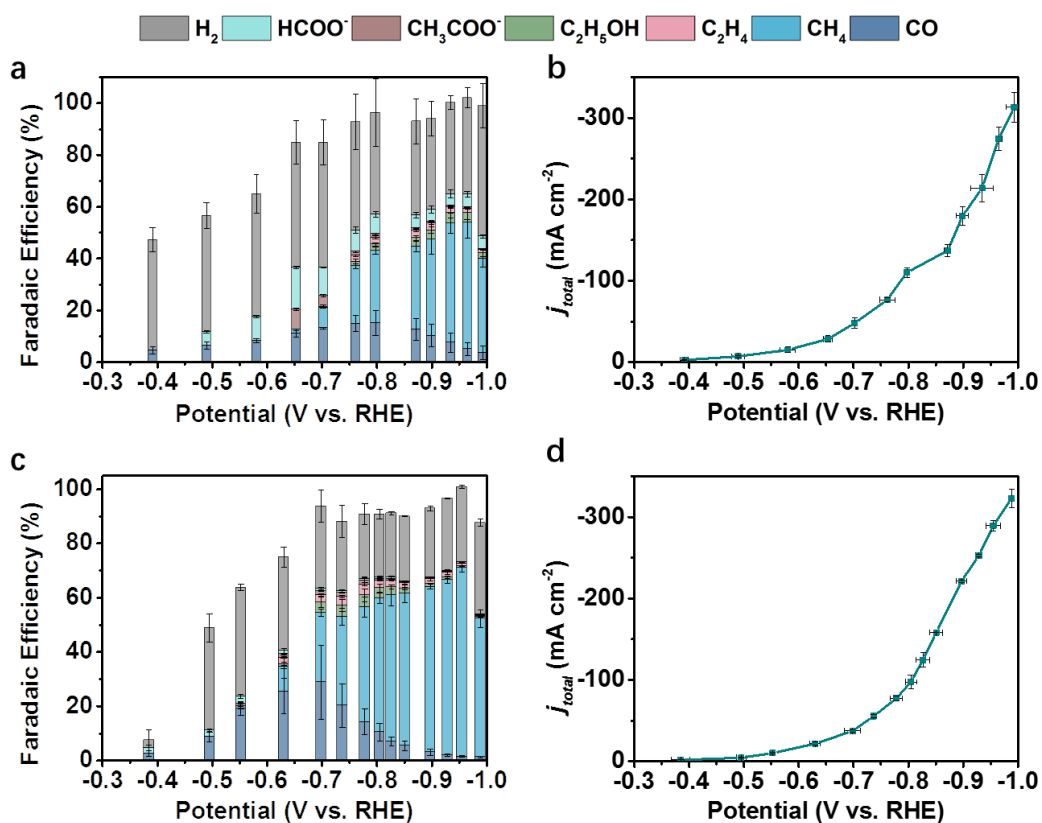

**Supplementary Figure 8.** (a) The Faradaic efficiency of all products of CO<sub>2</sub> reduction as a function of the applied potential and (b) the  $j_{total}$  of CO<sub>2</sub> reduction for GQD-NH<sub>2</sub>-L. (c) and (d) Data analogous to (a) and (b) but for the sample of GQD-NH<sub>2</sub>-H.

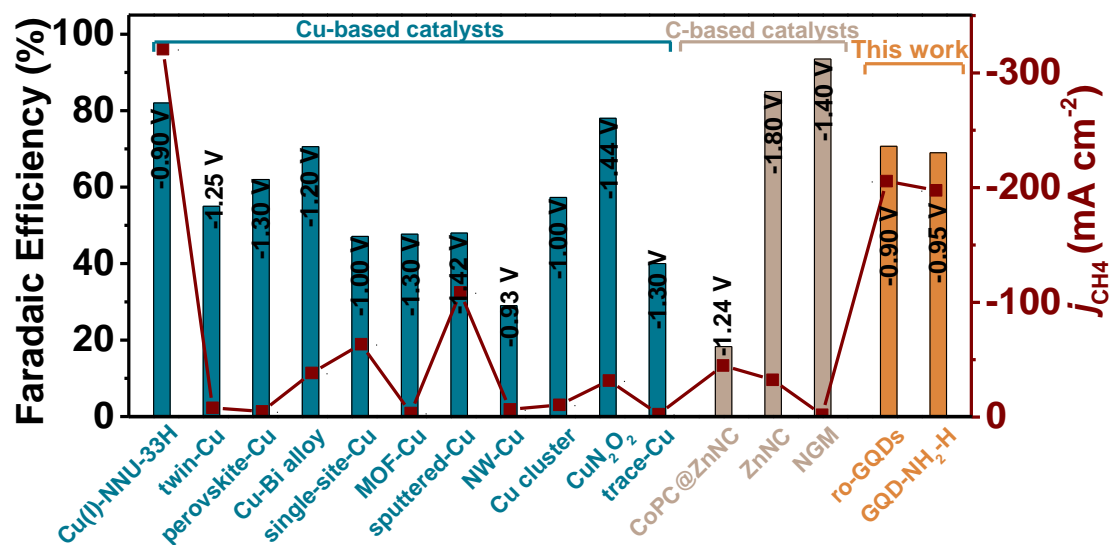

**Supplementary Figure 9.** Comparison of the selectivity and activity of the GQDs catalysts toward CH<sub>4</sub> with the state-of-the-art CH<sub>4</sub>-selective catalysts.<sup>1-14</sup>

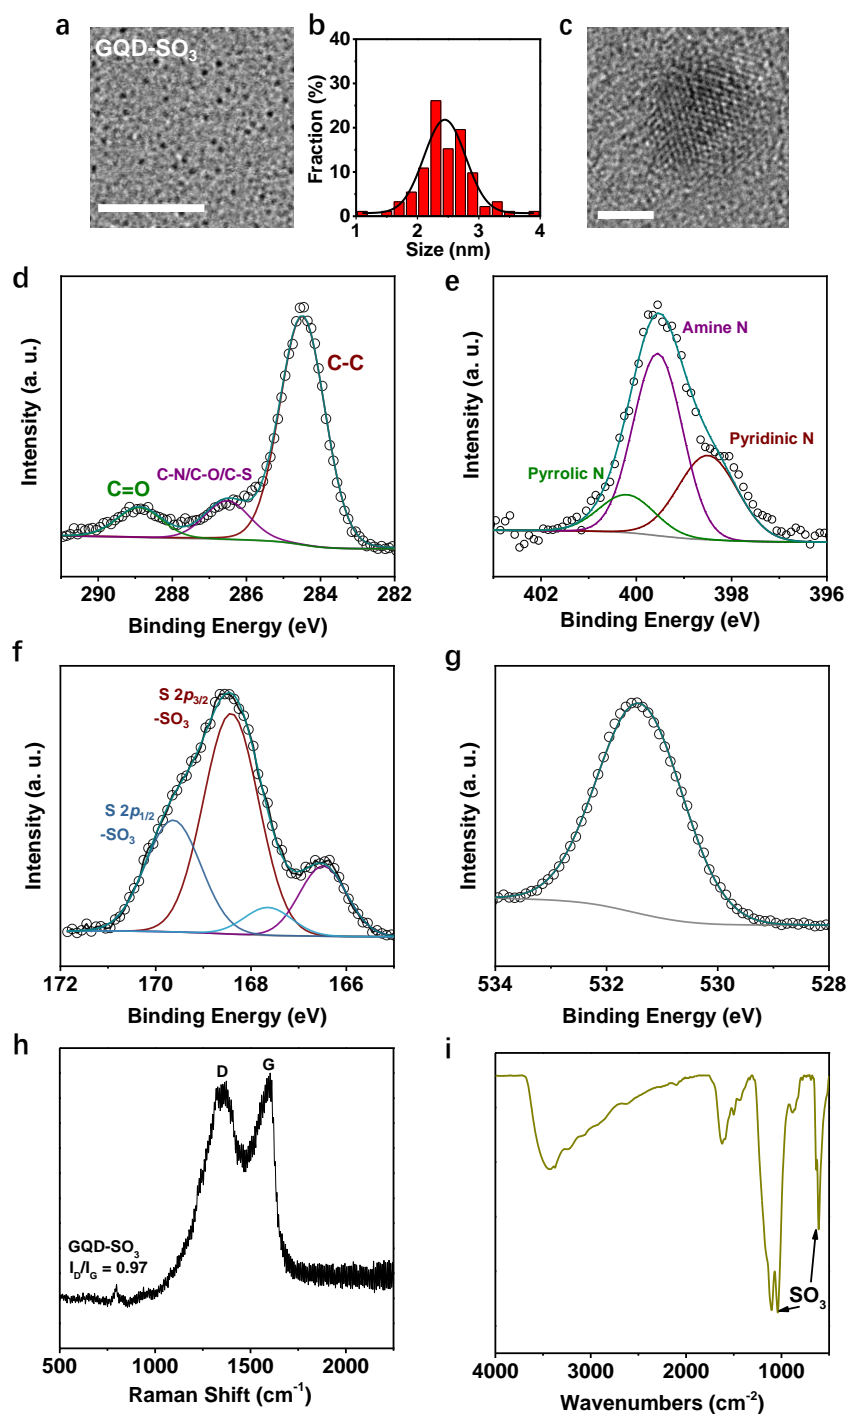

**Supplementary Figure 10.** TEM images (a), the lateral size distributions (b), and HRTEM images (c) of the GQD-SO<sub>3</sub>. Scale bar: 50 nm for figure (a) and 2 nm for figure (c). The high-resolution (d) C 1s, (e) N 1s, (f) S 2p, and (g) O 1s spectra of the GQD-SO<sub>3</sub>. (h) The Raman spectra and (i) The FTIR spectra of the GQD-SO<sub>3</sub>.

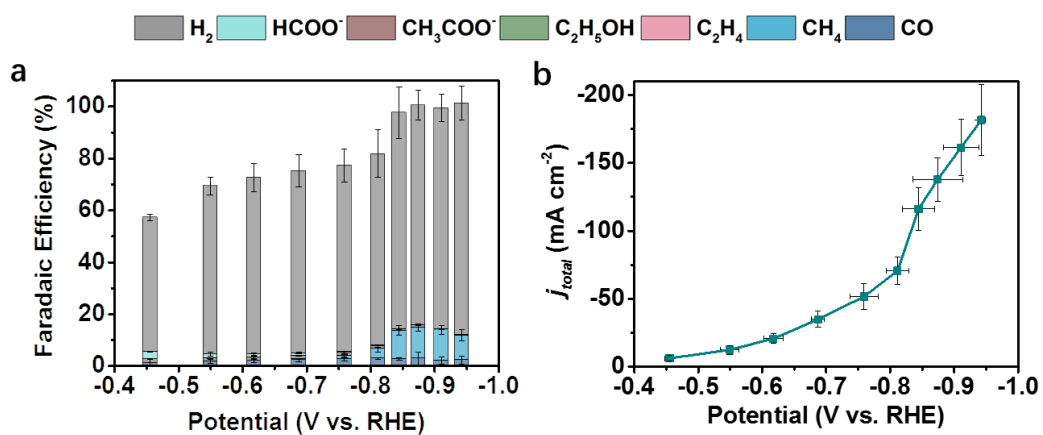

**Supplementary Figure 11.** (a) The Faradaic efficiency of all CO<sub>2</sub> reduction products as a function of the applied potential and (b) the  $j_{total}$  of CO<sub>2</sub> reduction for the GQD-SO<sub>3</sub>. The error bars represent the standard deviation from the measurements of three independent samples.

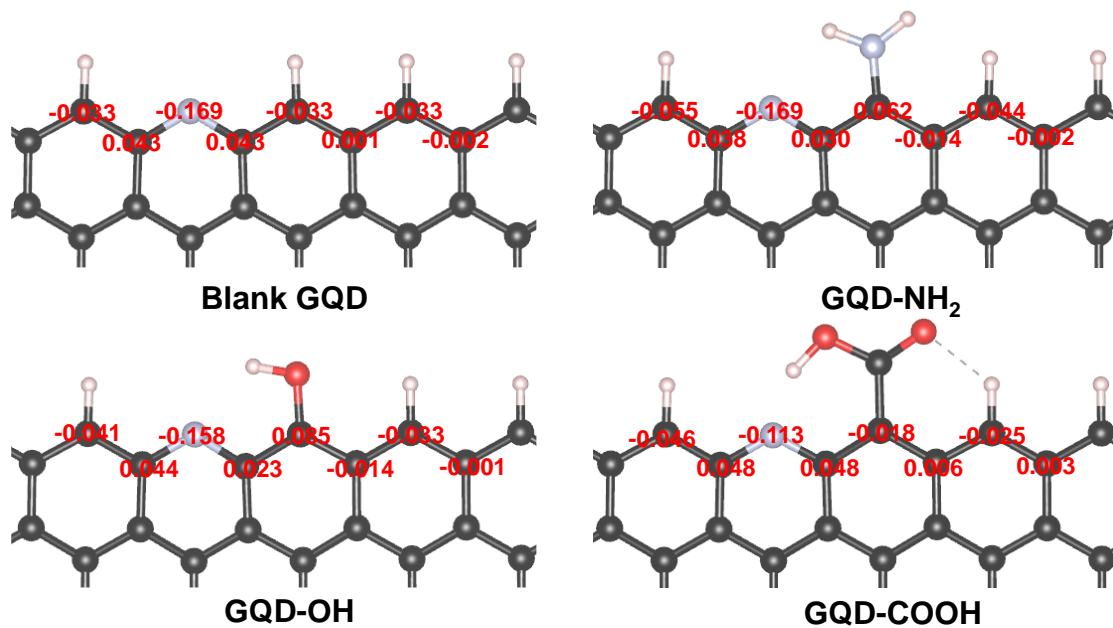

**Supplementary Figure 12.** Plots of the Hirshfeld charge for the NH<sub>2</sub>-, OH-, and COOH-functionalized GQD, and blank GQD. The numbers represent the charge on the corresponding atoms.

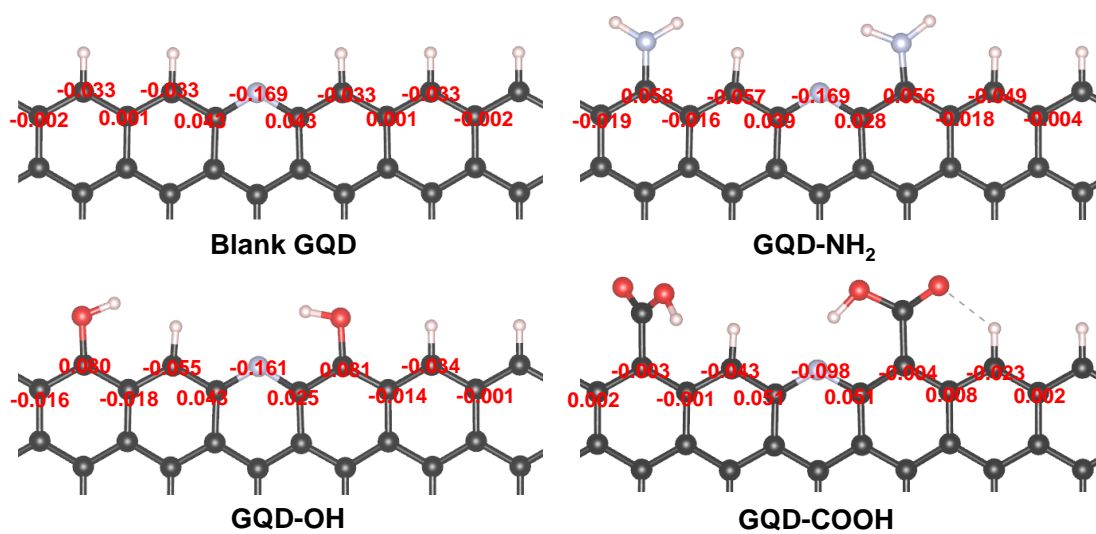

**Supplementary Figure 13.** The Hirshfeld charge of the pyridinic N and several representative C atoms on GQD substrates decorated with two functional groups.

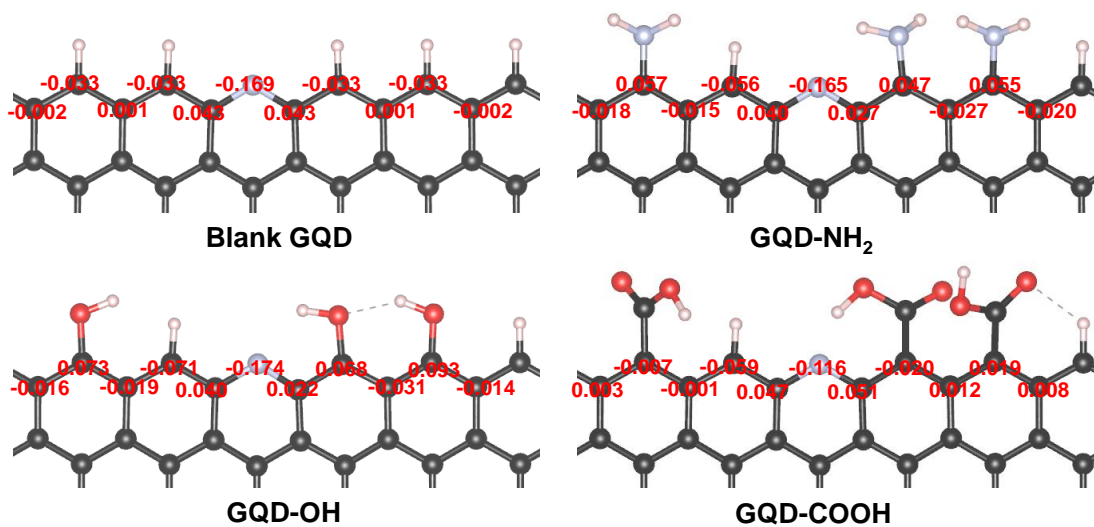

**Supplementary Figure 14.** The Hirshfeld charge of the pyridinic N and several representative C atoms on GQD substrates decorated with three functional groups.

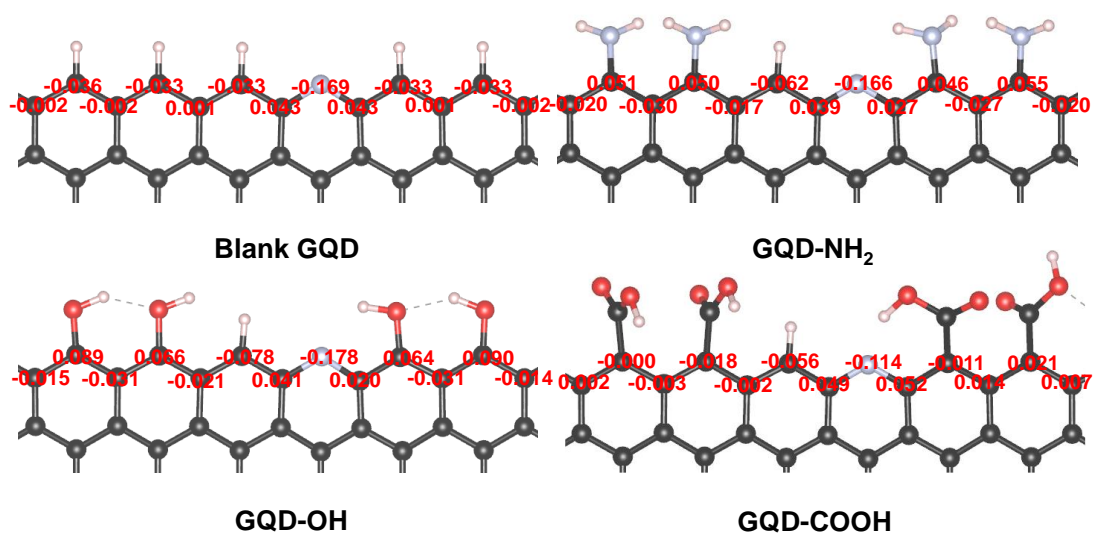

**Supplementary Figure 15.** The Hirshfeld charge of the pyridinic N and several representative C atoms on GQD substrates decorated with four functional groups.



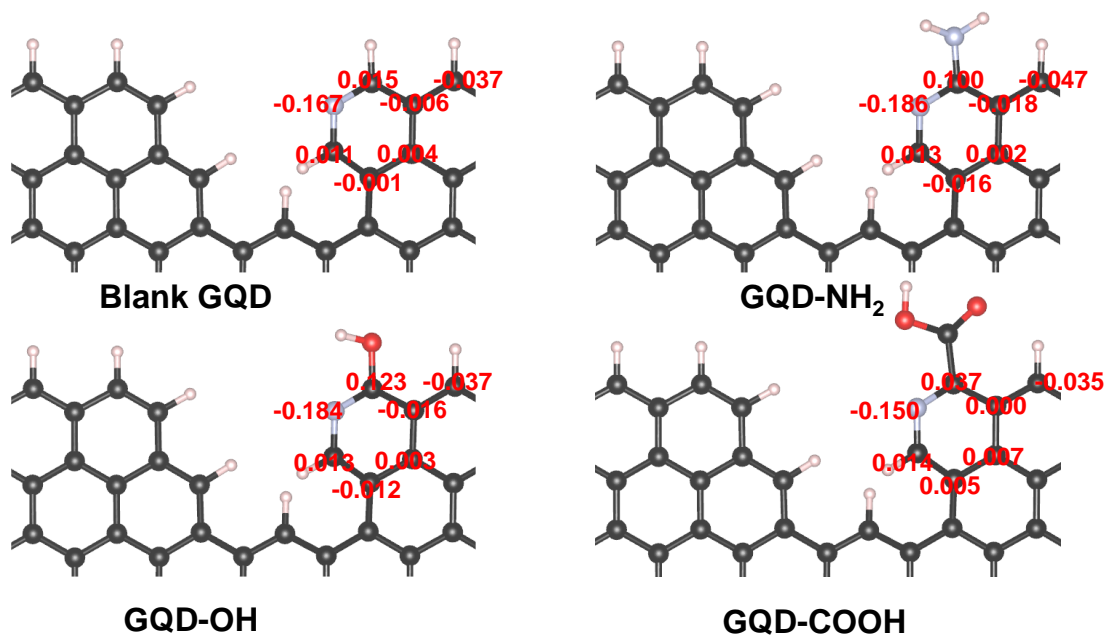

**Supplementary Figure 16.** The Hirshfeld charge of the pyridinic N and several representative C atoms on defective GQD substrates decorated with one functional group.



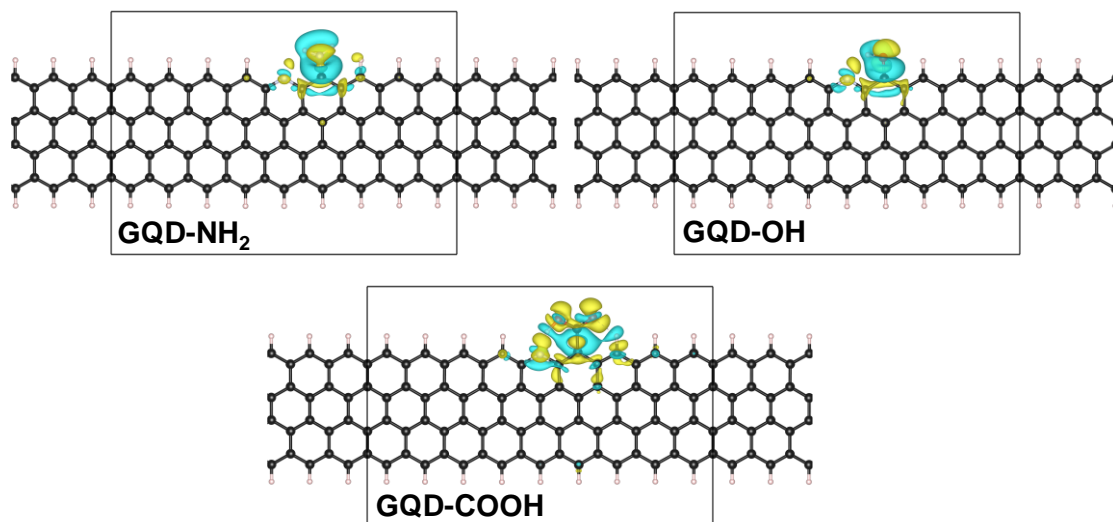

**Supplementary Figure 18.** Plots of electron density difference for the NH<sub>2</sub>-, OH-, and COOH-functionalized GQD with one N-dopant. The yellow color corresponds to an isosurface of 0.002 e Bohr<sup>-3</sup> and blue of -0.002 e Bohr<sup>-3</sup>.

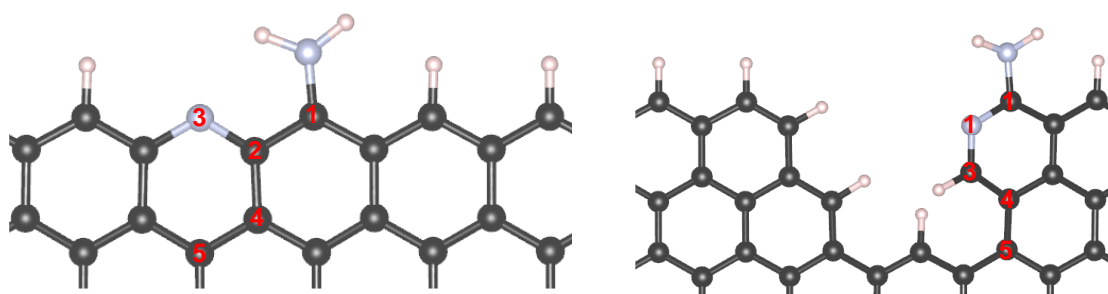

**Supplementary Figure 19.** The modeled GQD slab and defective GQD slab with one N-dopant and one -NH<sub>2</sub> functional group. Five representative positions adjacent to the functional group are denoted as from 1 to 5. The distance between the position and the functional group increases from 1 to 5.

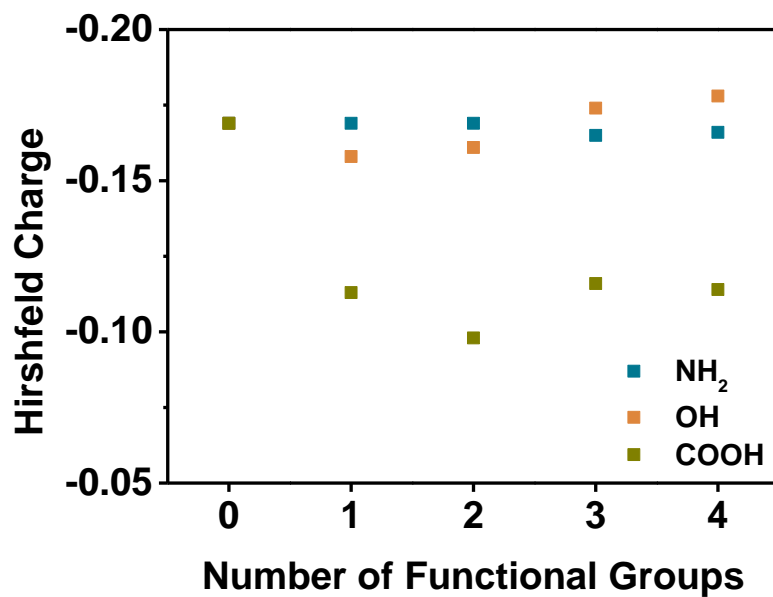

**Supplementary Figure 20.** The calculated Hirshfeld charge of the pyridinic-N as a function of the number of neighboring functional groups. The data is derived from **Figure R11-14**.

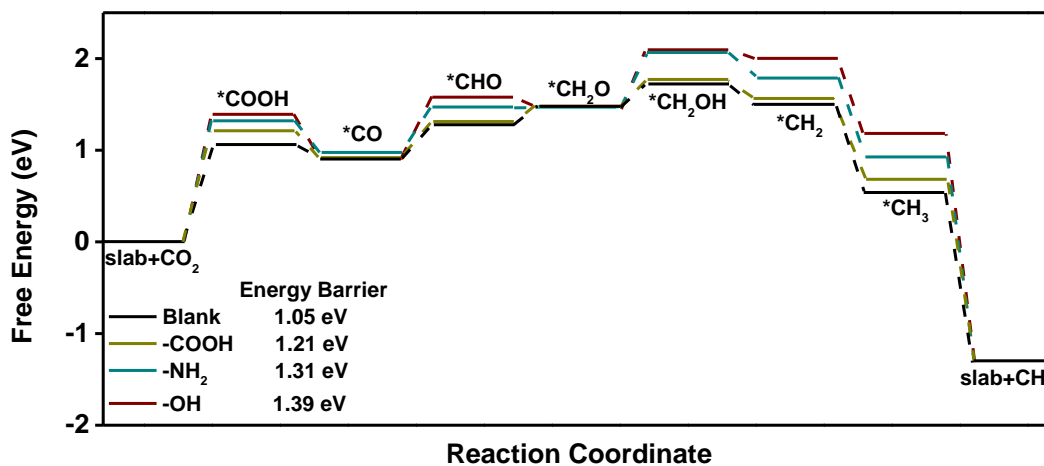

**Supplementary Figure 21.** Gibbs free energy diagram for electrochemical CO<sub>2</sub> to CH<sub>4</sub> conversion catalyzed by four types of defective GQDs with pyridinic N on position-2 as the active site. The energy barriers for the rate-determining step of CO<sub>2</sub> to \*COOH conversion are listed at the bottom.

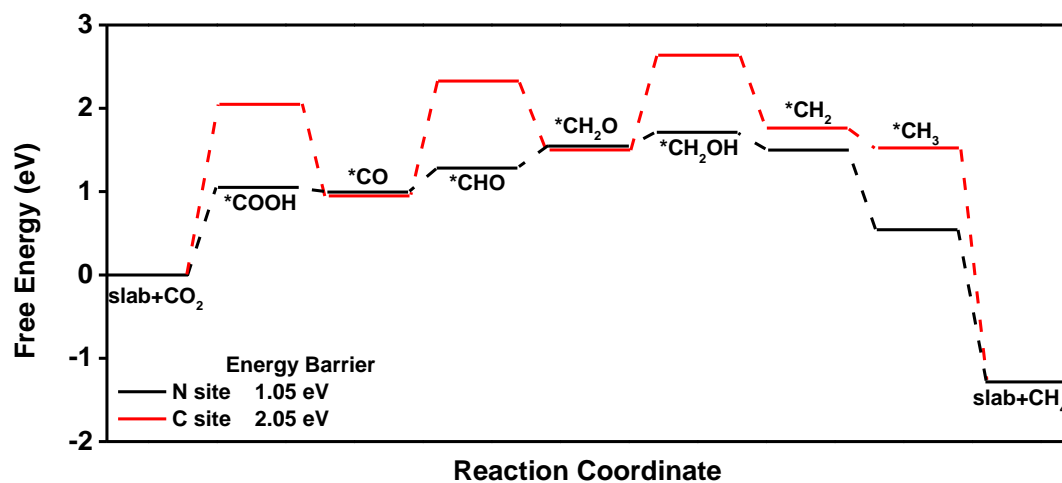

**Supplementary Figure 22.** Gibbs free energy diagram for electrochemical CO<sub>2</sub> to CH<sub>4</sub> conversion catalyzed by two types of defective GQDs with C or pyridinic N on position-2 as the active site. The energy barriers for the rate-determining step of CO<sub>2</sub> to \*COOH conversion are listed at the bottom.

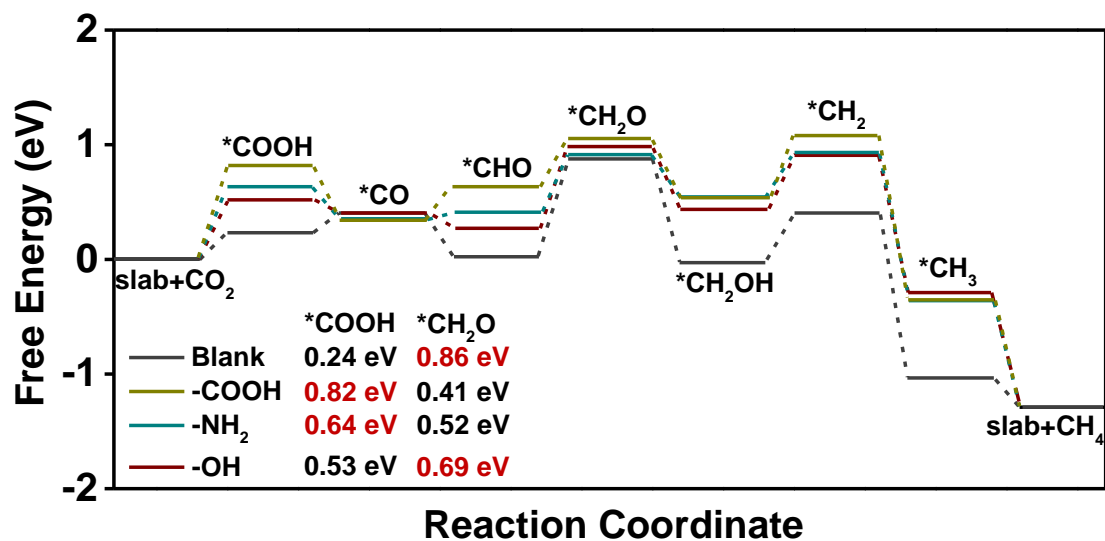

**Supplementary Figure 23.** Gibbs free energy diagram for electrochemical CO<sub>2</sub> to CH<sub>4</sub> conversion catalyzed by four types of GQDs with pyridinic N on position-3 as the active site. The energy barriers for the formation of two key intermediates are listed at the bottom. The energy barriers for the varying rate-determining step are labeled in red.



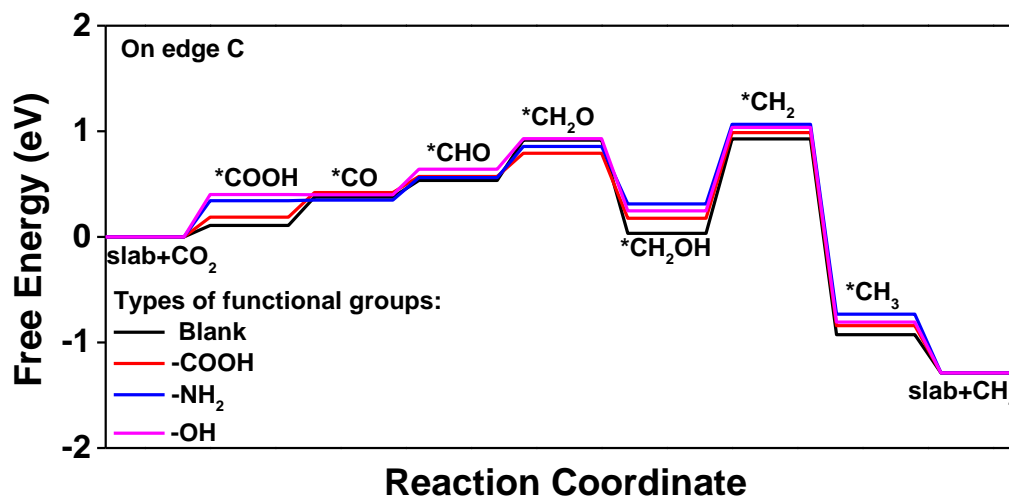

**Supplementary Figure 24.** Gibbs free energy diagram for electrochemical CO<sub>2</sub> to CH<sub>4</sub> conversion catalyzed by four types of GQDs with C on position-3 as the active site.

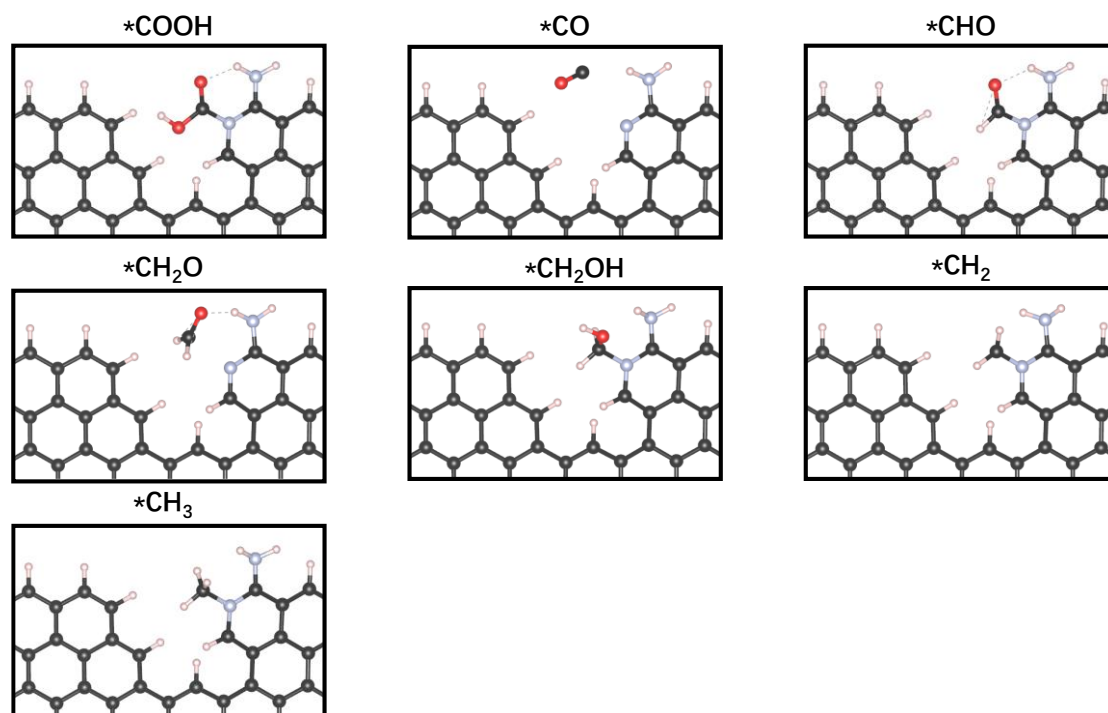

**Supplementary Figure 25.** The visual geometries of each elementary step in the  $\text{CO}_2$  to  $\text{CH}_4$  conversion on the  $\text{NH}_2$ -functionalized defective GQD with pyridinic N on position-2 as the active site.

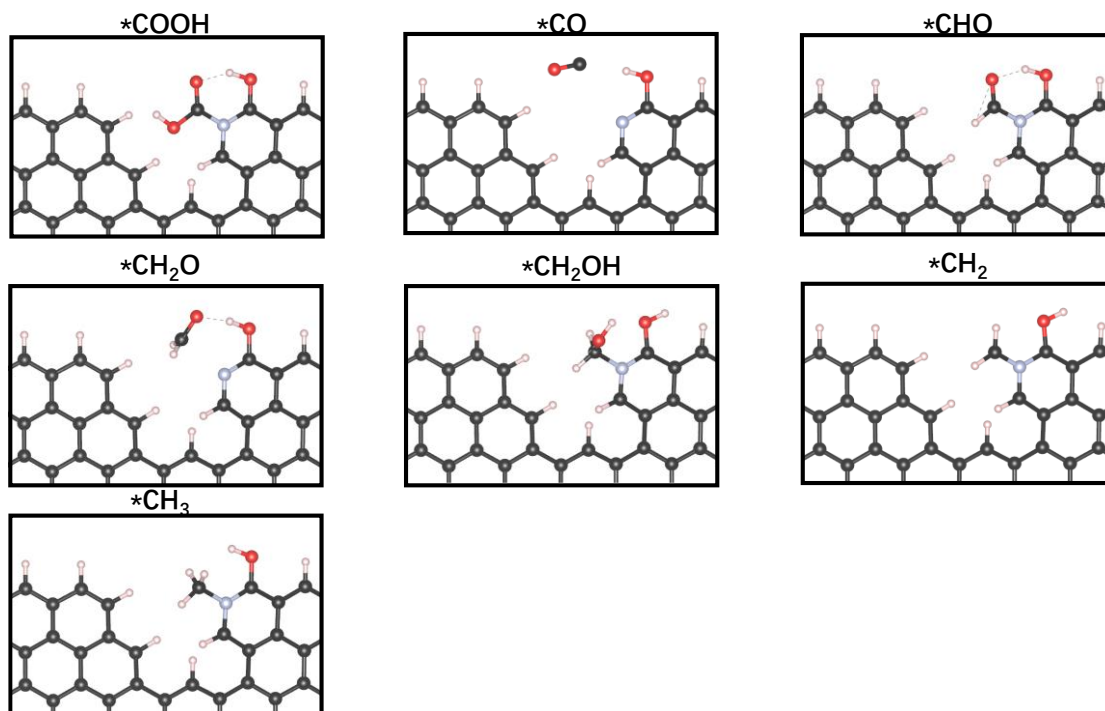

**Supplementary Figure 26.** The visual geometries of each elementary step in the  $\text{CO}_2$  to  $\text{CH}_4$  conversion on the OH-functionalized defective GQD with pyridinic N on position-2 as the active site.

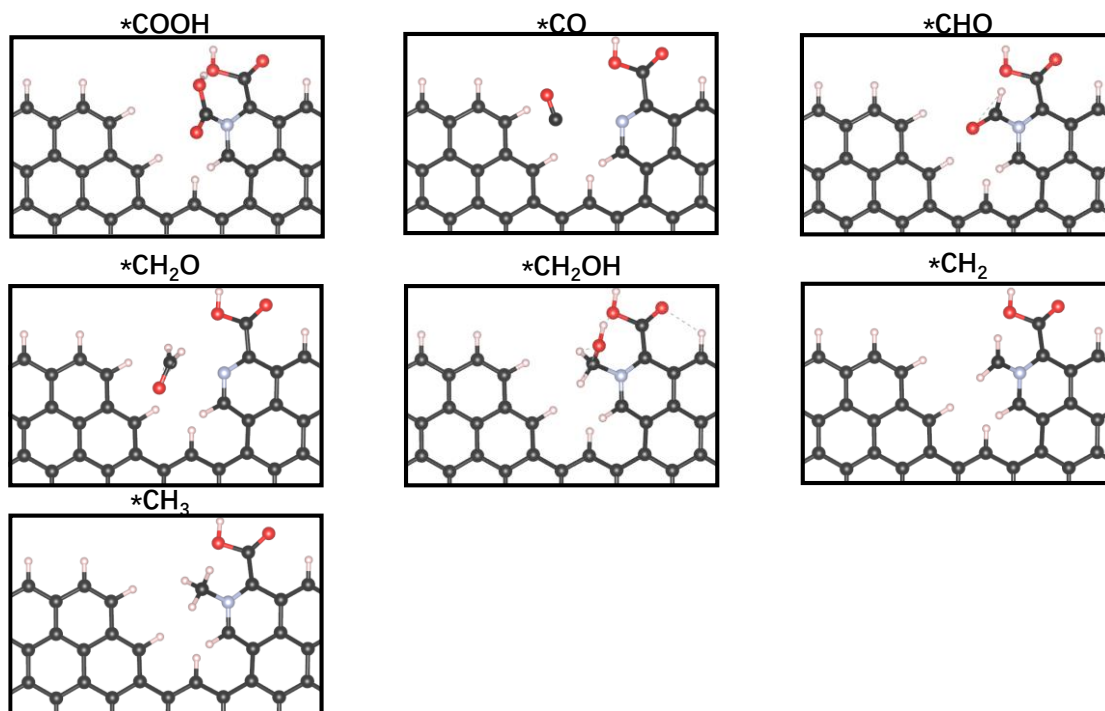

**Supplementary Figure 27.** The visual geometries of each elementary step in the  $\text{CO}_2$  to  $\text{CH}_4$  conversion on the COOH-functionalized defective GQD with pyridinic N on position-2 as the active site.

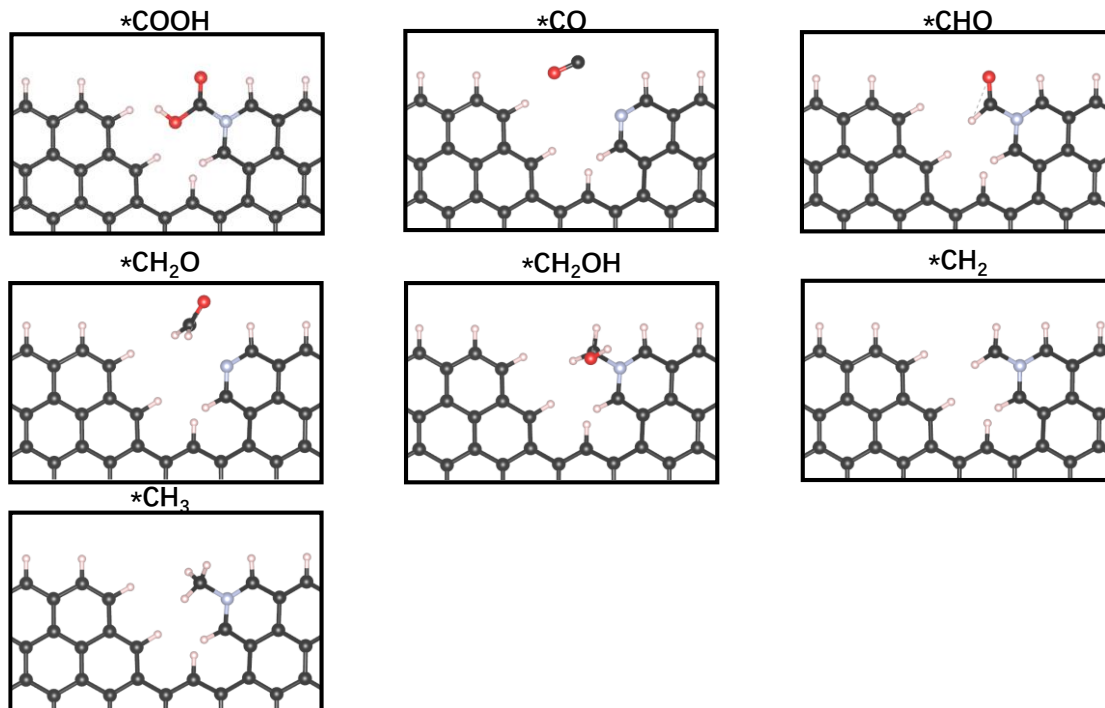

**Supplementary Figure 28.** The visual geometries of each elementary step in the  $\text{CO}_2$  to  $\text{CH}_4$  conversion on the blank defective GQD with pyridinic N on position-2 as the active site.

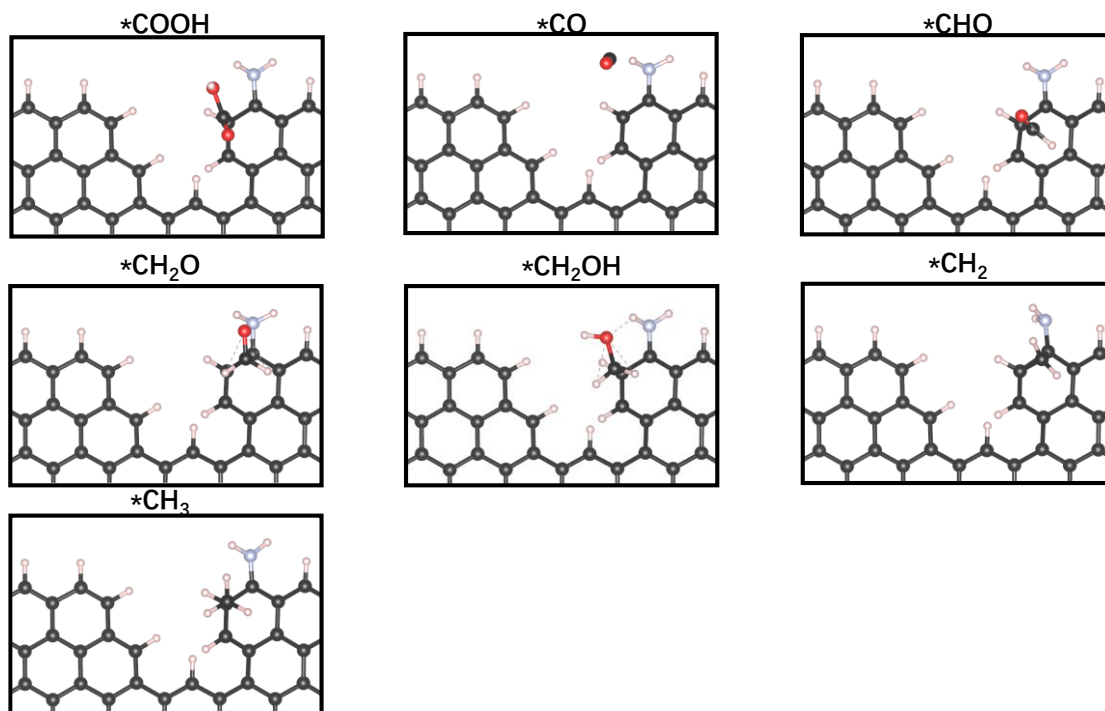

**Supplementary Figure 29.** The visual geometries of each elementary step in the  $\text{CO}_2$  to  $\text{CH}_4$  conversion on the  $\text{NH}_2$ -functionalized defective GQD with C on position-2 as the active site.

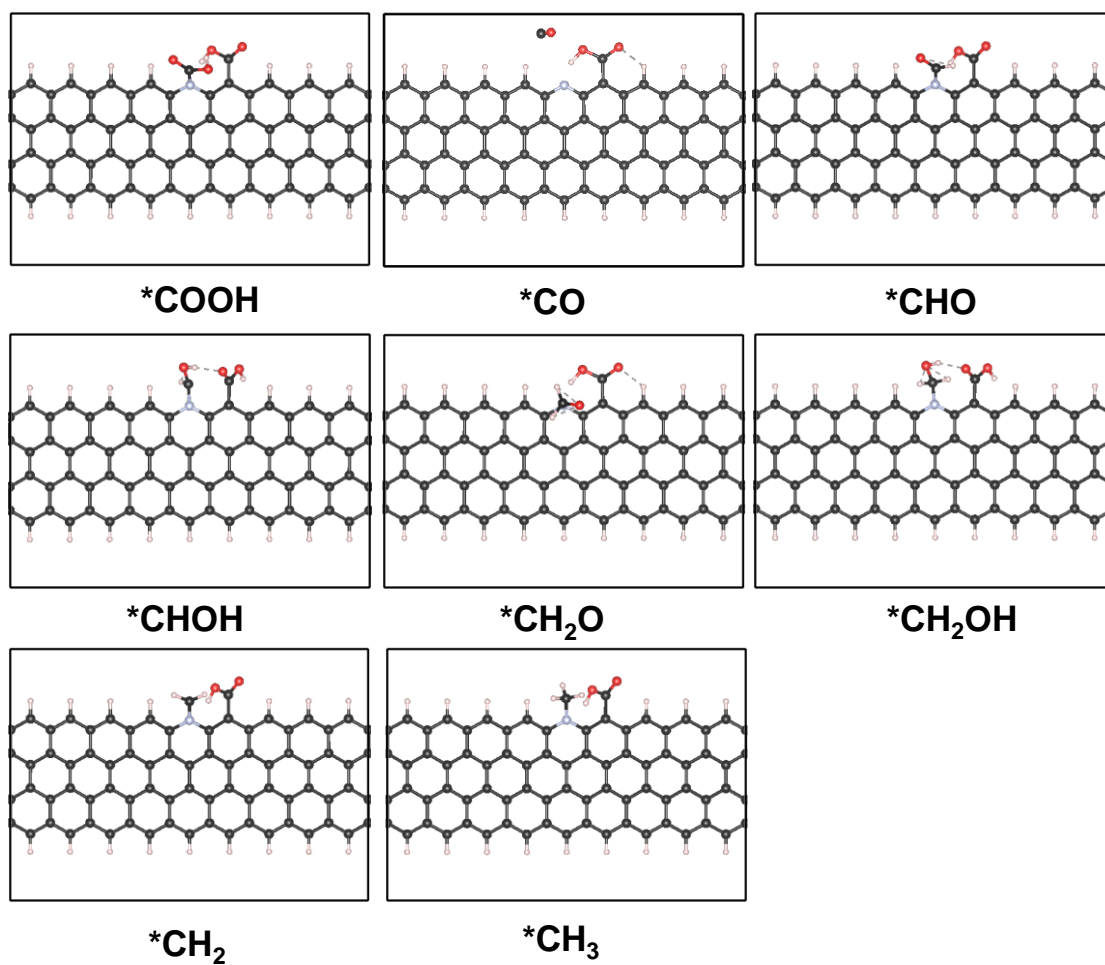

**Supplementary Figure 30.** The visual geometries of each elementary step in the CO<sub>2</sub> to CH<sub>4</sub> conversion on the COOH-functionalized GQD with pyridinic N on position-3 as the active site.

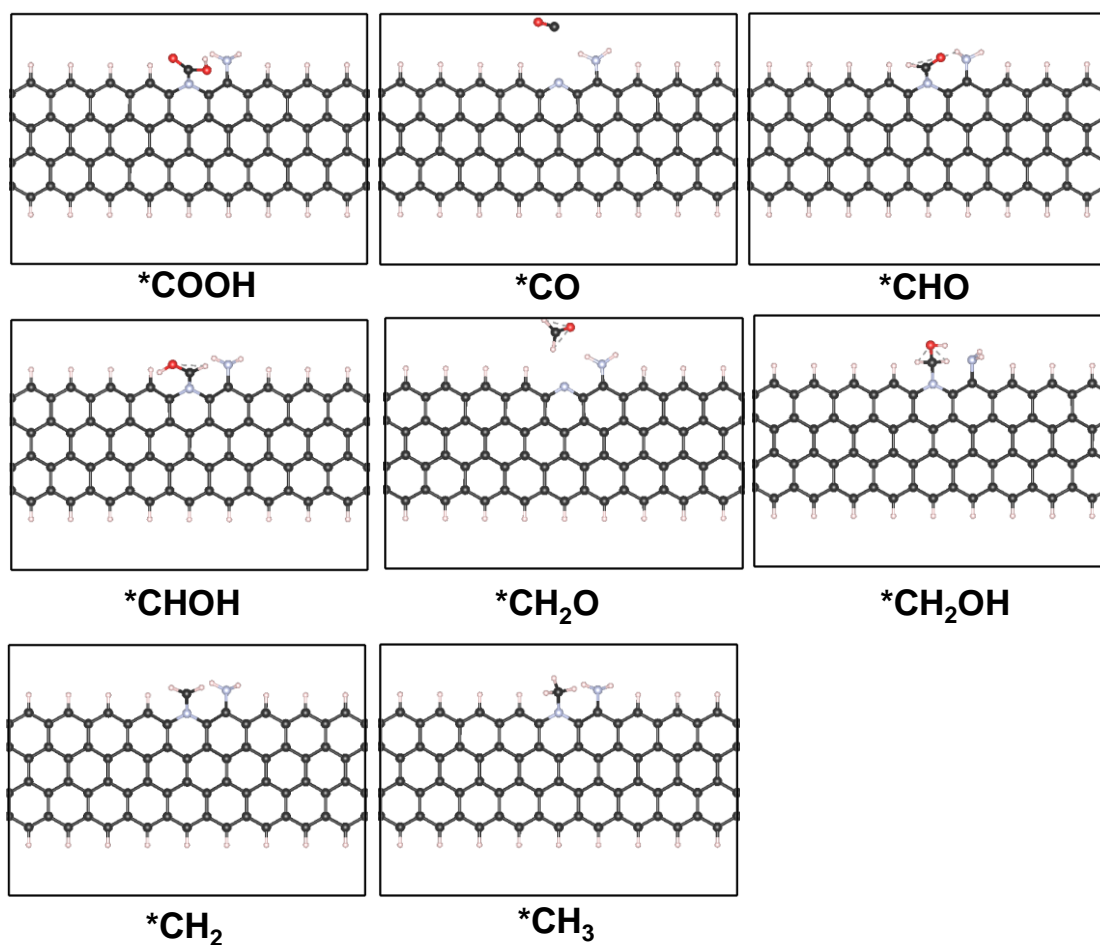

**Supplementary Figure 31.** The visual geometries of each elementary step in the CO<sub>2</sub> to CH<sub>4</sub> conversion on the NH<sub>2</sub>-functionalized GQD with pyridinic N on position-3 as the active site.



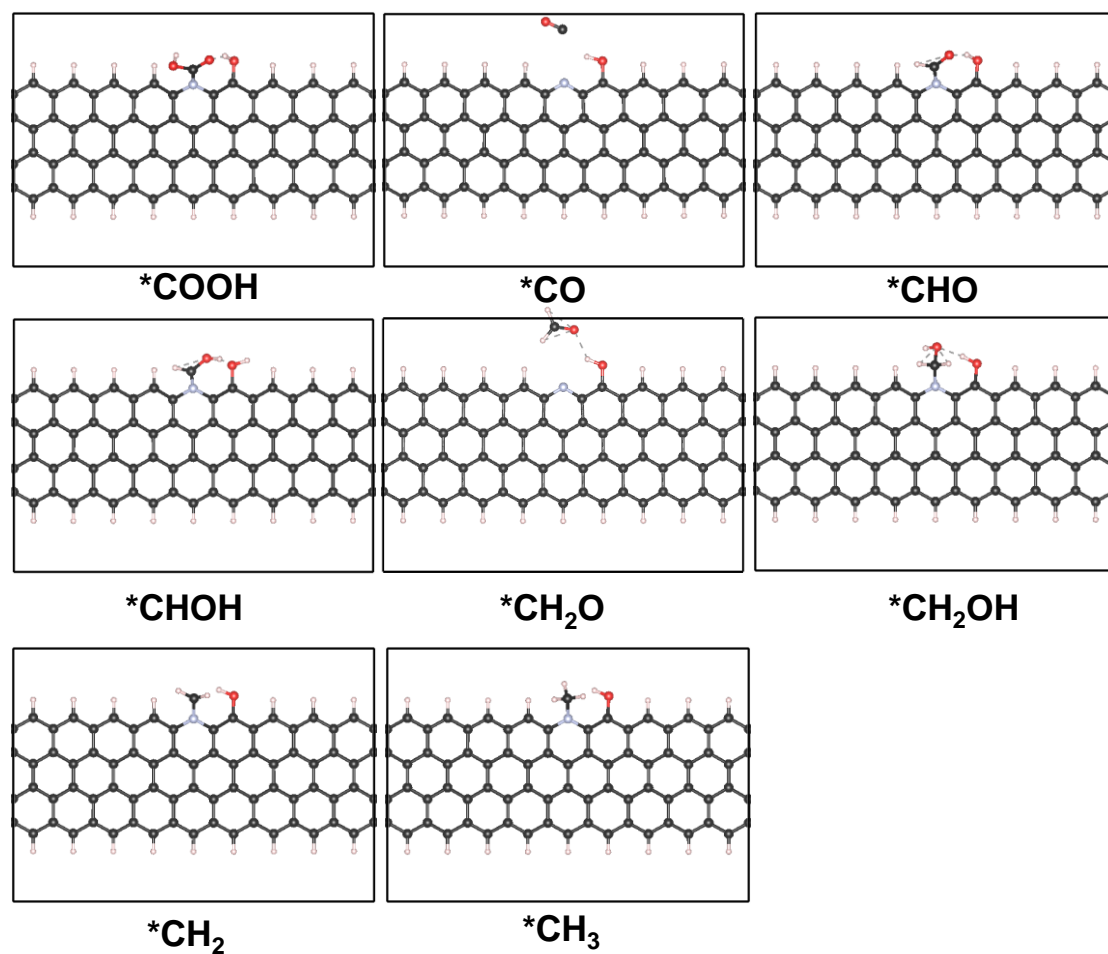

**Supplementary Figure 32.** The visual geometries of each elementary step in the  $\text{CO}_2$  to  $\text{CH}_4$  conversion on the OH-functionalized GQD with pyridinic N on position-3 as the active site.

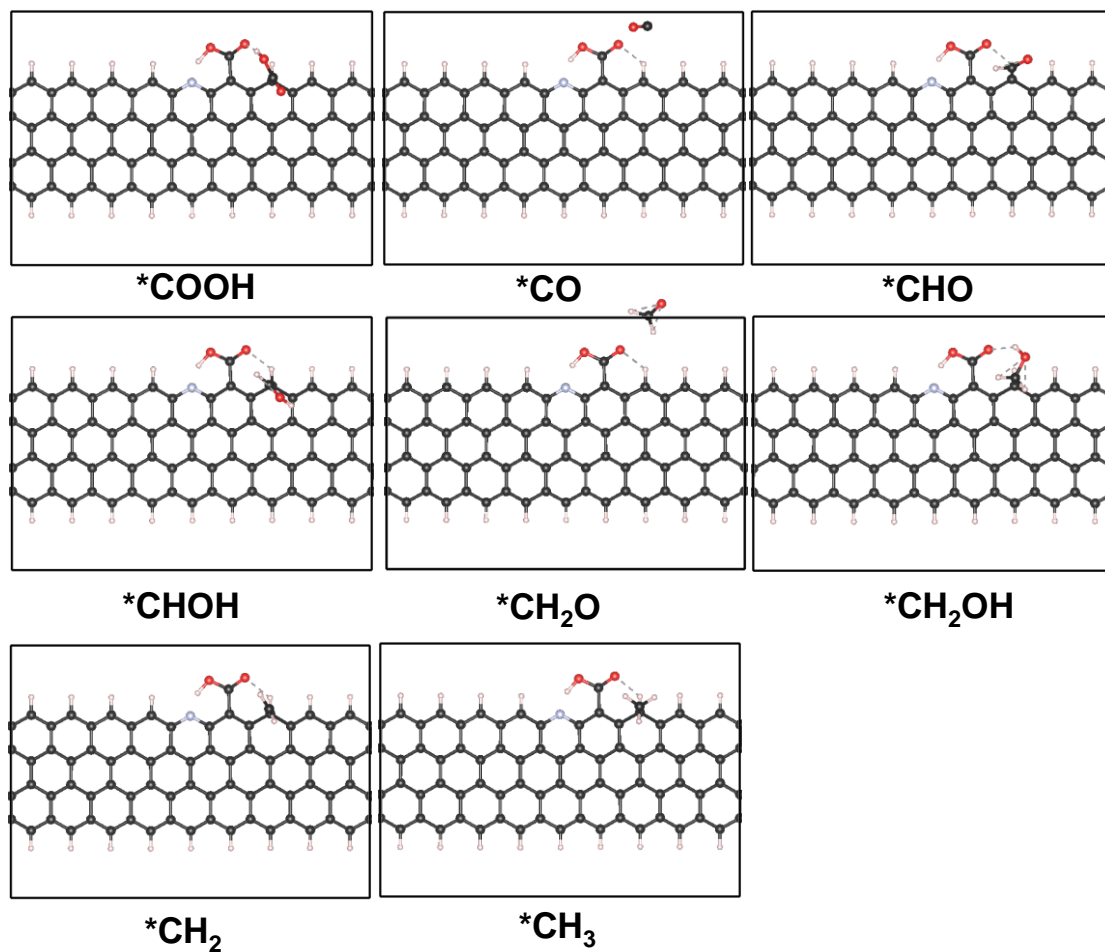

**Supplementary Figure 33.** The visual geometries of each elementary step in the  $\text{CO}_2$  to  $\text{CH}_4$  conversion on the  $\text{COOH}$ -functionalized GQD with C on position-3 as the active site.

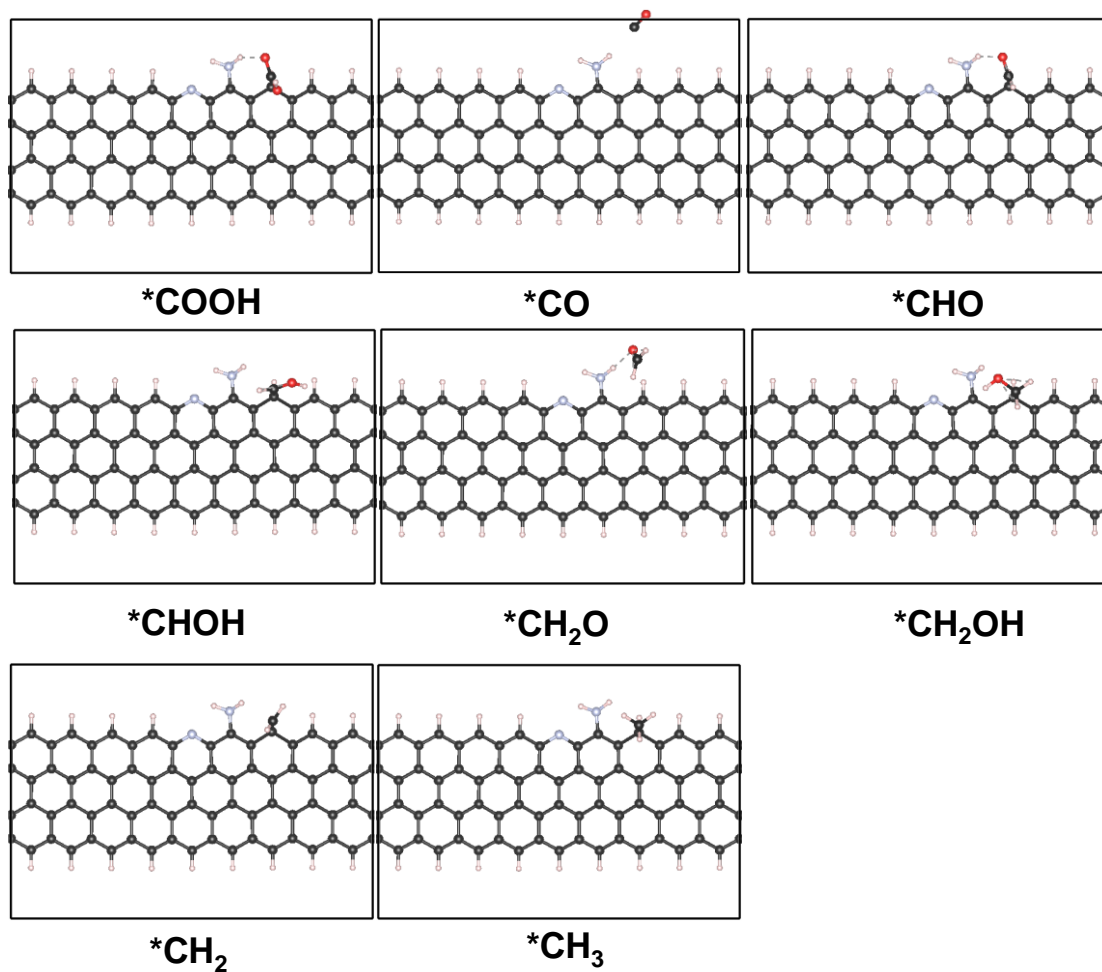

**Supplementary Figure 34.** The visual geometries of each elementary step in the  $\text{CO}_2$  to  $\text{CH}_4$  conversion on the  $\text{NH}_2$ -functionalized GQD with C on position-3 as the active site.

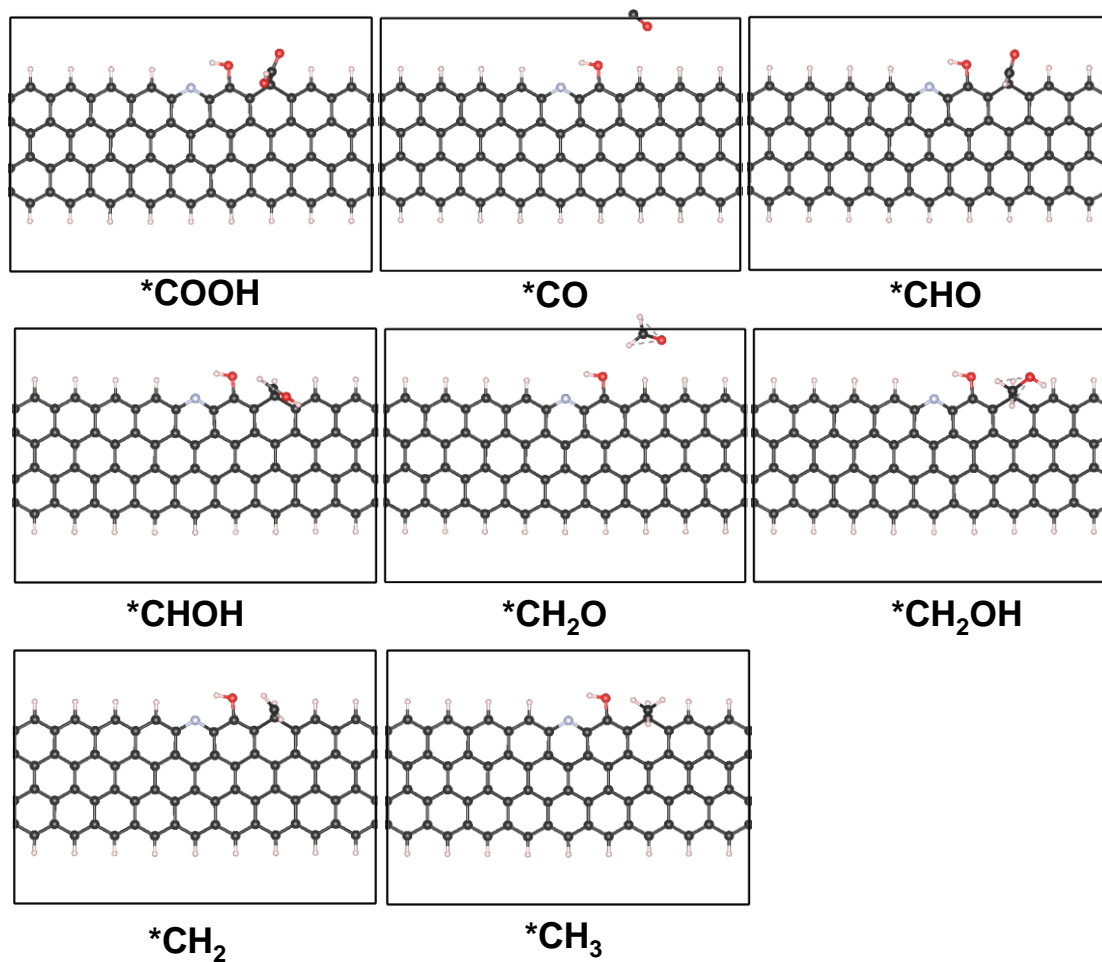

**Supplementary Figure 35.** The visual geometries of each elementary step in the  $\text{CO}_2$  to  $\text{CH}_4$  conversion on the OH-functionalized GQD with C on position-3 as the active site.

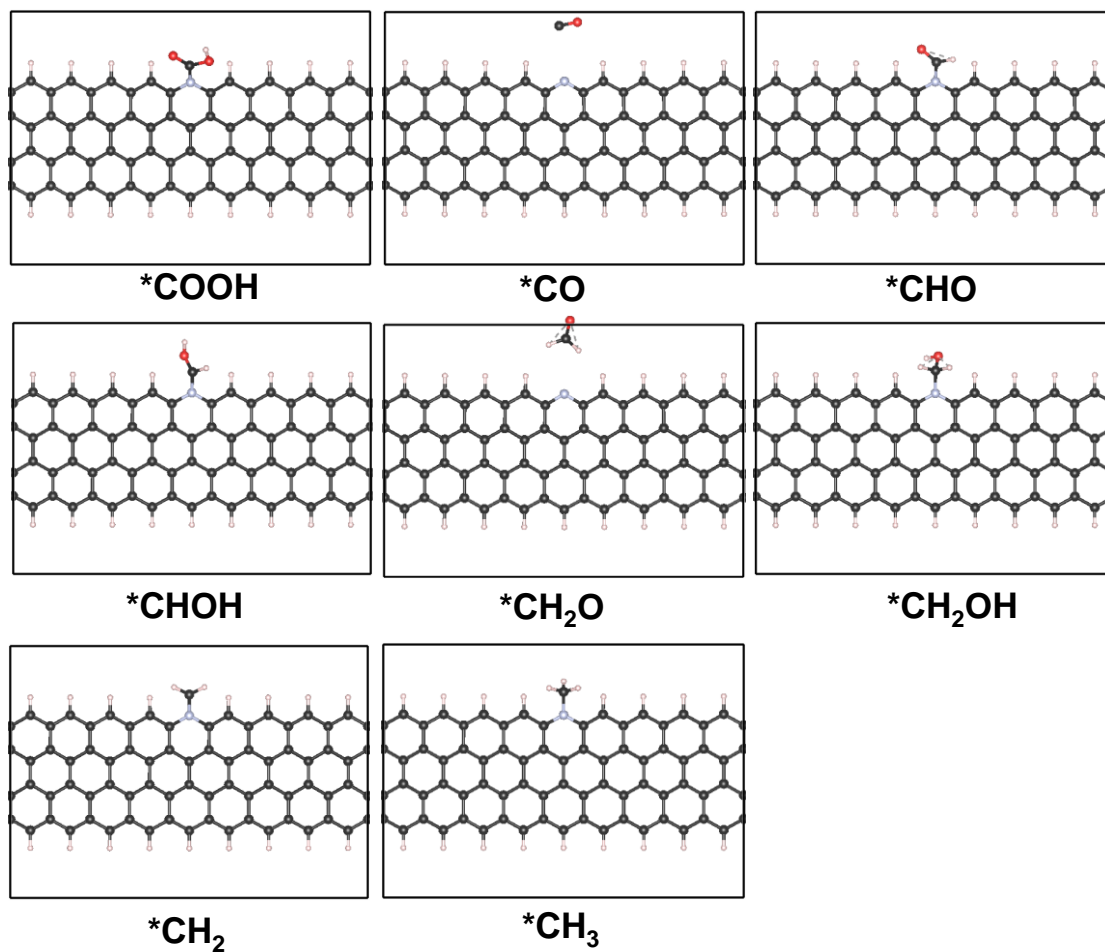

**Supplementary Figure 36.** The visual geometries of each elementary step in the CO<sub>2</sub> to CH<sub>4</sub> conversion on the pyridinic N of blank GQD.

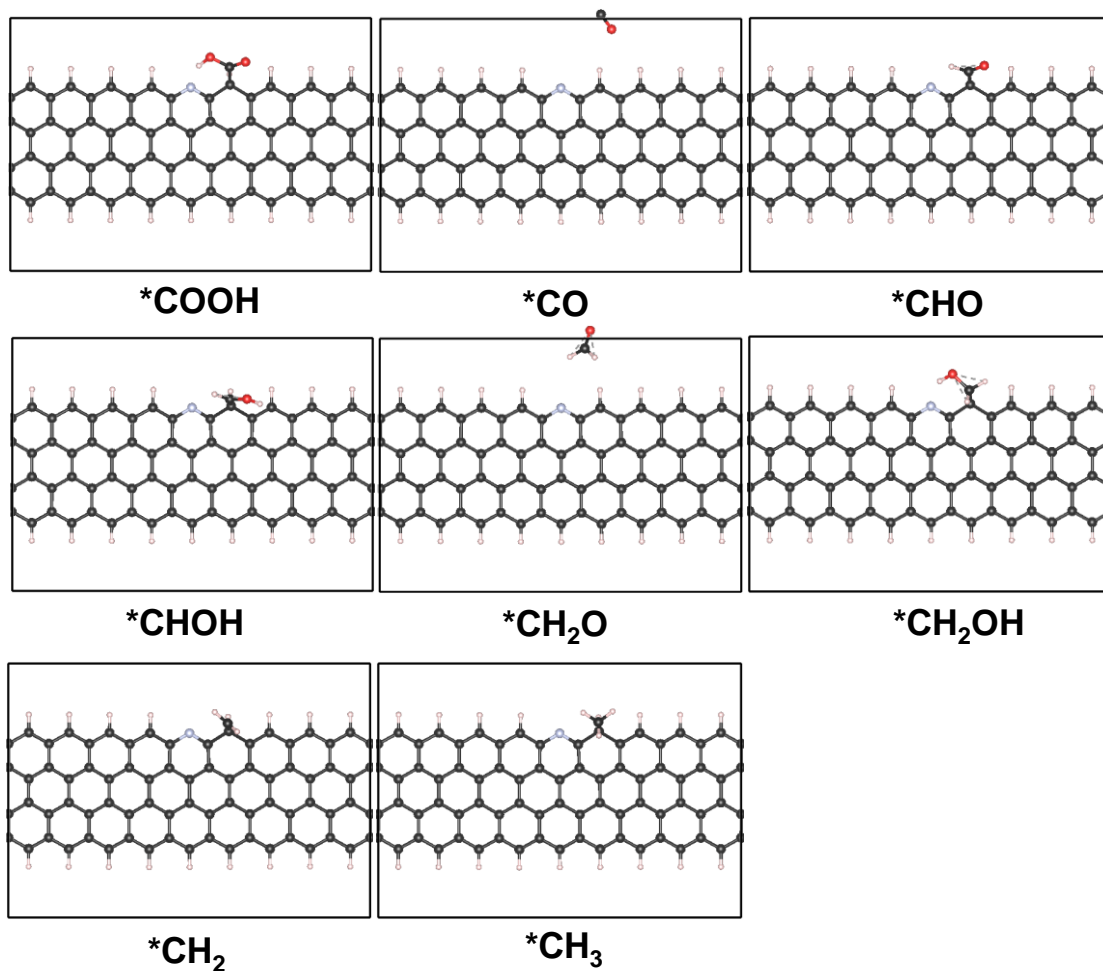

**Supplementary Figure 37.** The visual geometries of each elementary step in the  $\text{CO}_2$  to  $\text{CH}_4$  conversion on the C of blank GQDs.

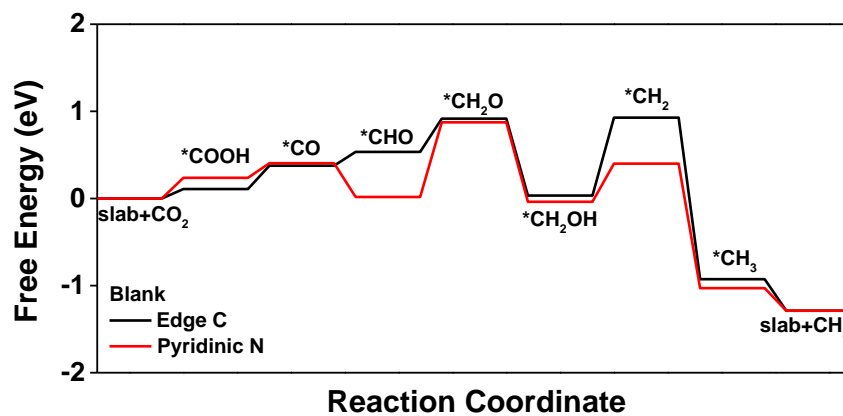

**Supplementary Figure 38.** Gibbs free energy diagram for the electrochemical CO<sub>2</sub> to CH<sub>4</sub> conversion catalyzed by blank GQDs assuming edge C and pyridinic N as the active sites.

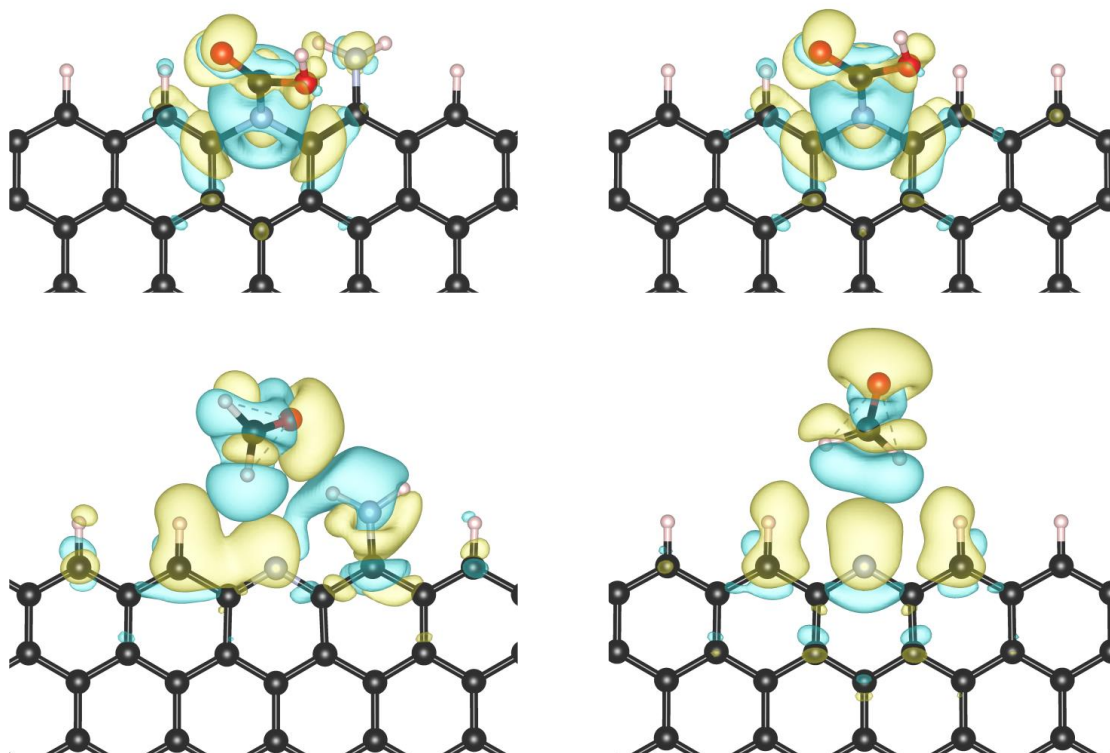

**Supplementary Figure 39.** Plots of electron density difference for the \*COOH and \*CH<sub>2</sub>O on pyridinic N on NH<sub>2</sub>-functionalized and blank GQDs. Top panel: adsorption of \*COOH on pyridinic N of NH<sub>2</sub>-functionalized GQDs (left) and blank GQDs (right); Bottom panel: adsorption of \*CH<sub>2</sub>O on pyridinic N of NH<sub>2</sub>-functionalized GQDs (left) and blank GQDs (right). The yellow color corresponds to an isosurface of 0.002 e Bohr<sup>-3</sup> and blue of -0.002 e Bohr<sup>-3</sup>.



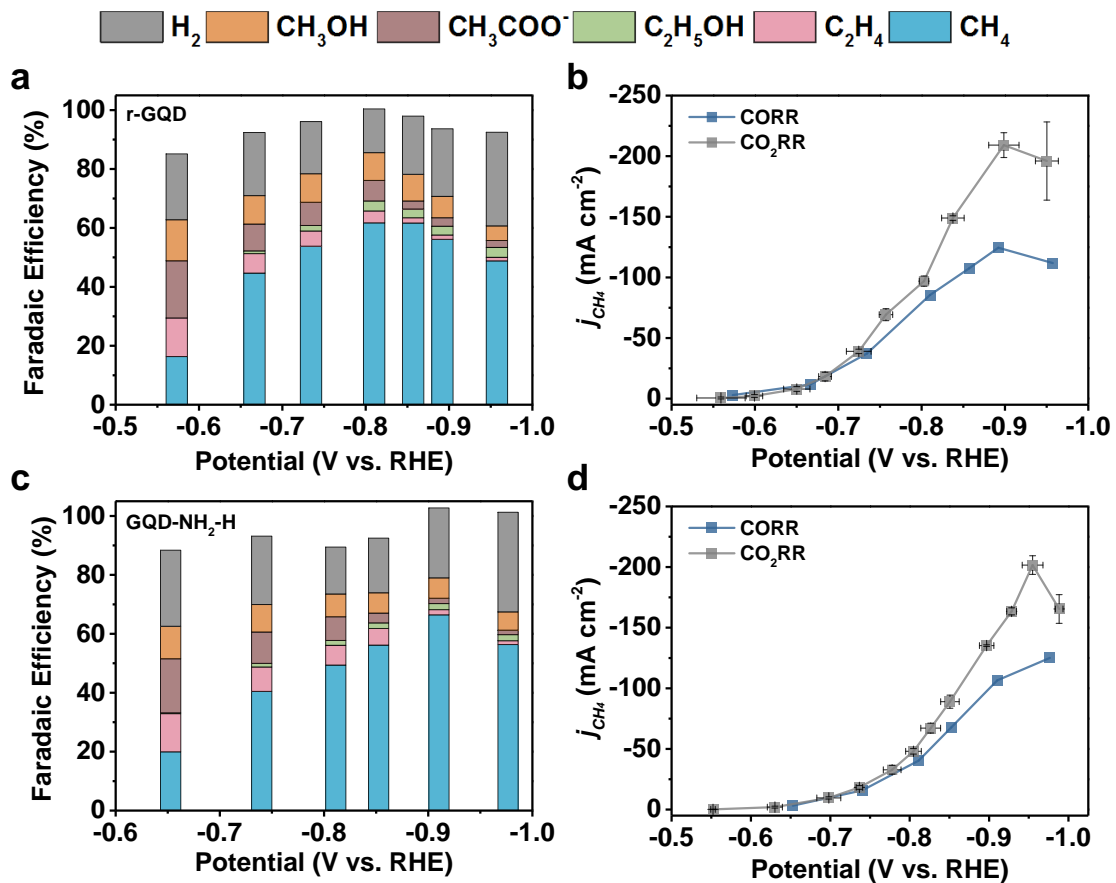

**Supplementary Figure 40.** (a and c) Faradaic efficiency of CO reduction products as a function of the applied potential on the (a) r-GQDs and (c) GQD-NH<sub>2</sub>-H. (b and d) The  $j_{CH_4}$  of CO reduction for the (b) r-GQDs and (d) GQD-NH<sub>2</sub>-H. As a comparison, the  $j_{CH_4}$  of CO<sub>2</sub> reduction for r-GQDs and GQD-NH<sub>2</sub>-H was also presented. The test was conducted in a high purity electrolyte of 1 M KOH (semiconductor grade, 99.99% trace metals basis).

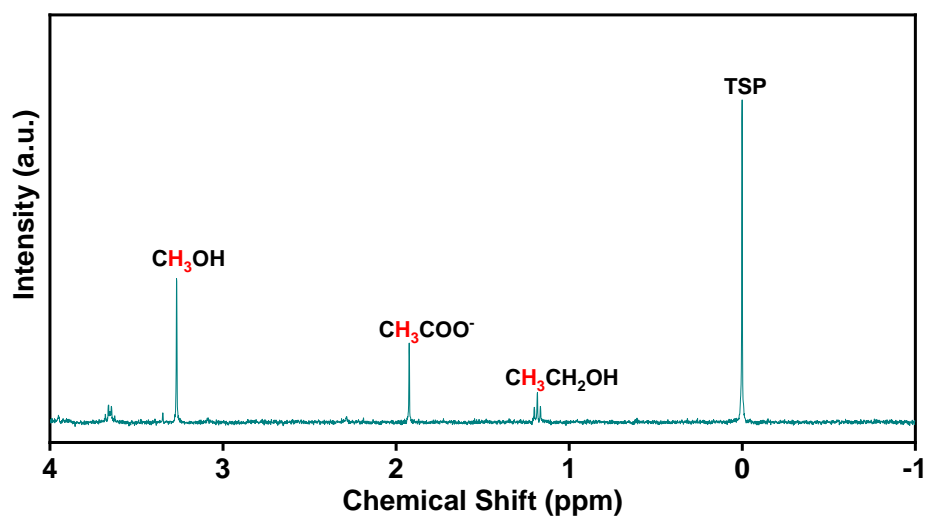

**Supplementary Figure 41.** A representative <sup>1</sup>H-NMR spectrum of liquid products for the electrochemical CO reduction on r-GQD. TSP ((CH<sub>3</sub>)<sub>3</sub>SiCD<sub>2</sub>CD<sub>2</sub>CO<sub>2</sub>Na) was used as an internal standard for the quantification of liquid products.

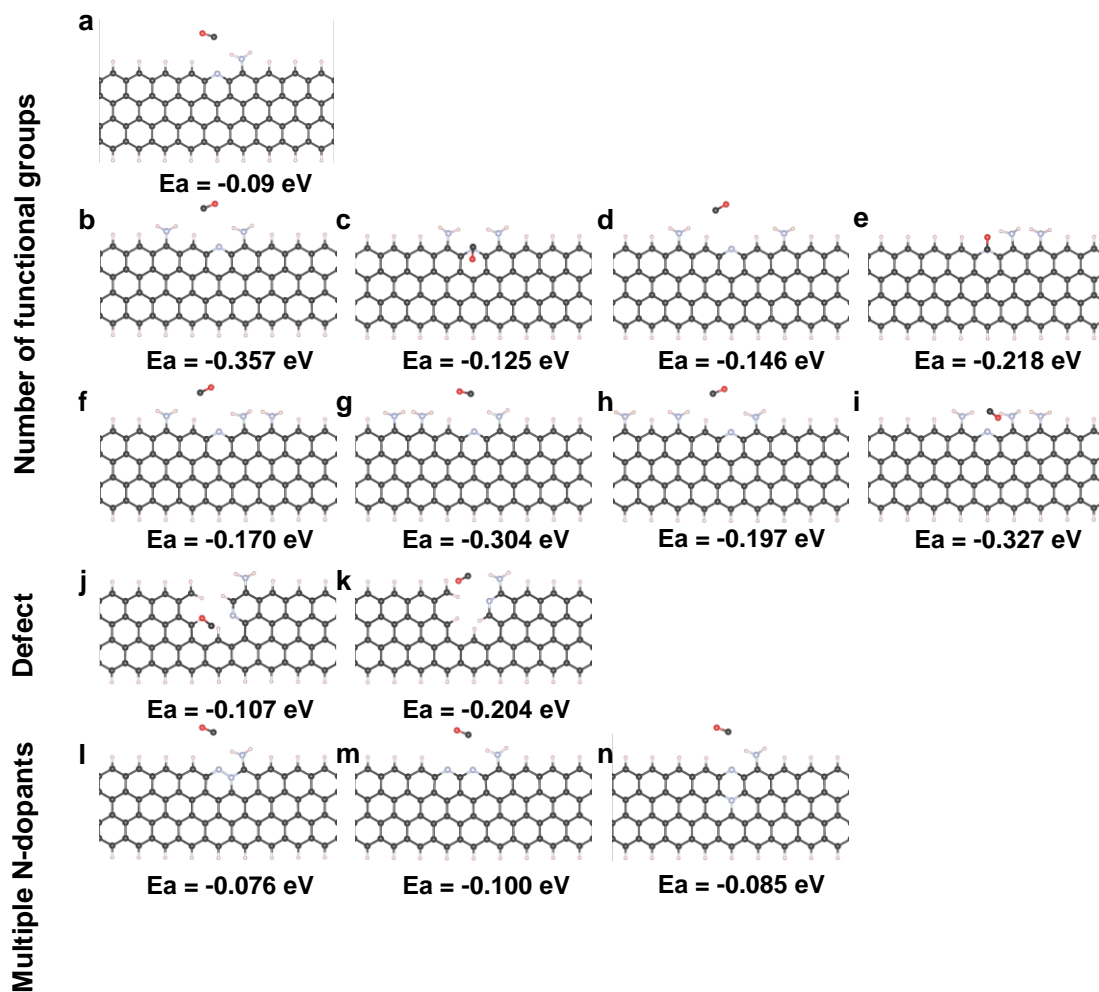

**Supplementary Figure 42.** The models of \*CO adsorption on the NH<sub>2</sub>-functionalized GQD substrate and the corresponding \*CO adsorption energy. The impact of (a-i) functional group's density, (j and k) morphological defect, and (l-n) multiple N-dopants on the \*CO adsorption energy.

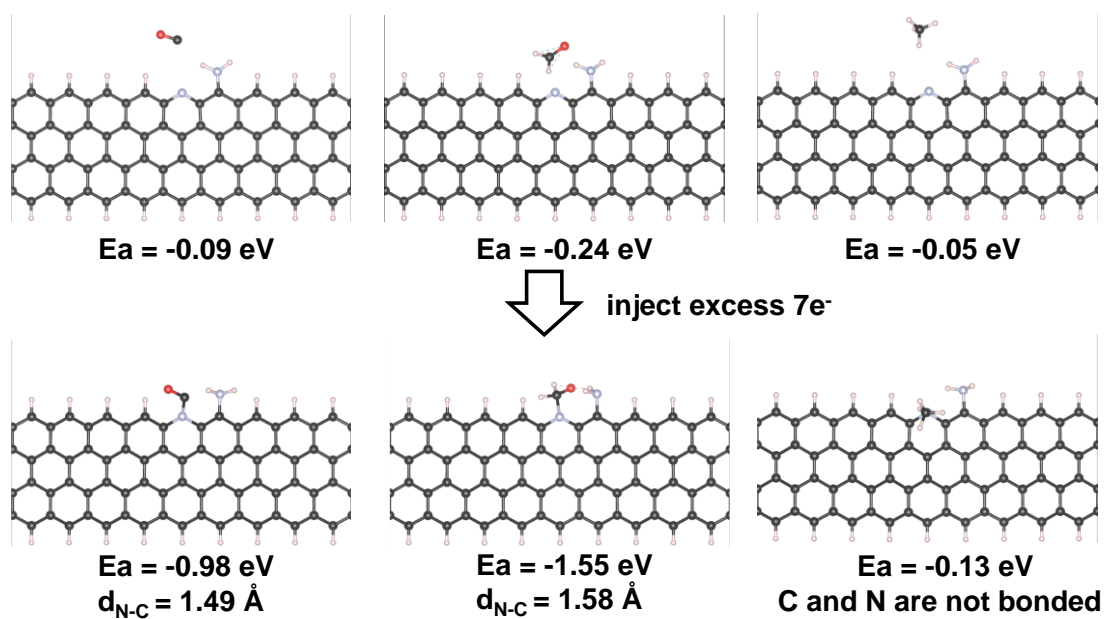

**Supplementary Figure 43.** The adsorption energy of  $^*\text{CO}$ ,  $^*\text{CH}_2\text{O}$ , and  $^*\text{CH}_4$  on one  $-\text{NH}_2$  group functionalized GQD substrate before and after the injection of seven electrons.

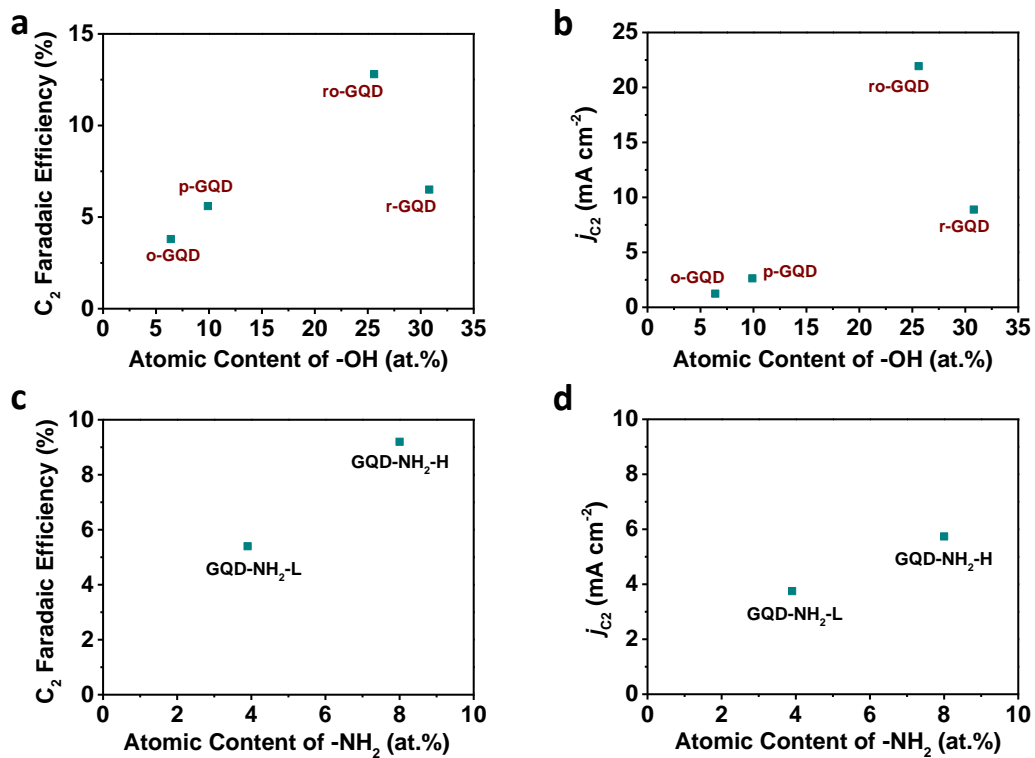

**Supplementary Figure 44.** The (a,c) Faradaic efficiency of  $C_2$  products and (b,d)  $j_{C_2}$  as a function of the (a,b) -OH content in the p-, o-, r-, and ro-GQDs and (c,d) - $NH_2$  content in the GQD-NH<sub>2</sub>-L and GQD-NH<sub>2</sub>-H.

**Supplementary Table 1.** The carbon mass equivalent of various CO<sub>2</sub> reduction products under each applied potential for r-GQDs.

| <b>Potential<br/>(V vs.<br/>RHE)</b> | <b>CO<br/>(mg)</b> | <b>CH<sub>4</sub><br/>(mg)</b> | <b>C<sub>2</sub>H<sub>4</sub><br/>(mg)</b> | <b>C<sub>2</sub>H<sub>5</sub>OH<br/>(mg)</b> | <b>CH<sub>3</sub>COO<sup>-</sup><br/>(mg)</b> | <b>HCOO<sup>-</sup><br/>(mg)</b> | <b>Total<br/>(mg)</b> |
|--------------------------------------|--------------------|--------------------------------|--------------------------------------------|----------------------------------------------|-----------------------------------------------|----------------------------------|-----------------------|
| <b>-0.30</b>                         | 0.0017             | 0                              | 0                                          | 0                                            | 0.0025                                        | 0.0042                           | 0.0083                |
| <b>-0.43</b>                         | 0.0149             | 0                              | 0                                          | 0                                            | 0.0017                                        | 0.0058                           | 0.0224                |
| <b>-0.55</b>                         | 0.0581             | 0.0017                         | 0.0006                                     | 0                                            | 0.0017                                        | 0.0091                           | 0.0711                |
| <b>-0.63</b>                         | 0.1353             | 0.0116                         | 0.0017                                     | 0                                            | 0.0025                                        | 0.0108                           | 0.1619                |
| <b>-0.72</b>                         | 0.2407             | 0.0573                         | 0.0010                                     | 0.0050                                       | 0.0042                                        | 0.0116                           | 0.3287                |
| <b>-0.73</b>                         | 0.2440             | 0.1386                         | 0.0216                                     | 0.0083                                       | 0.0042                                        | 0.0166                           | 0.4333                |
| <b>-0.78</b>                         | 0.2714             | 0.3453                         | 0.0324                                     | 0.0191                                       | 0.0050                                        | 0.0257                           | 0.6989                |
| <b>-0.84</b>                         | 0.2332             | 0.5453                         | 0.0365                                     | 0.0307                                       | 0.0083                                        | 0.0332                           | 0.8873                |
| <b>-0.94</b>                         | 0.2332             | 0.7188                         | 0.0249                                     | 0.0307                                       | 0.0050                                        | 0.0407                           | 1.0533                |
| <b>-0.98</b>                         | 0.1702             | 0.6408                         | 0.0133                                     | 0.0390                                       | 0.0058                                        | 0.0349                           | 0.9039                |
| <b>Total<br/>(mg)</b>                | 1.6027             | 2.4593                         | 0.1409                                     | 0.1328                                       | 0.0407                                        | 0.1926                           | 4.5689                |

---

**Supplementary Table 2.** Summary of the Cu content in the studied GQD samples prepared with reagent-grade precursors.

---

| <b>sample</b>          | <b>Cu content (ppb)</b> |
|------------------------|-------------------------|
| p-GQD                  | 416.2                   |
| r-GQD                  | 426.8                   |
| o-GQD                  | 492.8                   |
| ro-GQD                 | 433.9                   |
| GQD-NH <sub>2</sub> -L | 448.0                   |
| GQD-NH <sub>2</sub> -H | 459.9                   |
| GQD-SO <sub>3</sub>    | 487.7                   |

---

**Supplementary Table 3.** The Cu concentration, counts per second (CPS), and CPS relative standard deviation (CPS RSD) of clean-r-GQD and clean-GQD-NH<sub>2</sub>-H catalysts prepared from high purity chemicals, their corresponding gas diffusion electrodes (GDEs), and the gas diffusion layer (GDL) substrates. The calibration results for each test are also provided here.

|          | Sample                                   | Cu concentration (ppb) | CPS        | CPS RSD |
|----------|------------------------------------------|------------------------|------------|---------|
| Catalyst | Calibration 0_0 ppb                      | 0.47                   | 8,269.90   | 6.46    |
|          | Calibration 1_1 ppb                      | 0.54                   | 9,305.20   | 0.13    |
|          | Calibration 5_5 ppb                      | 4.76                   | 70,269.90  | 1.34    |
|          | Calibration 10_10 ppb                    | 10.00                  | 146,016.86 | 0.20    |
|          | Calibration 25_25 ppb                    | 25.53                  | 370,427.97 | 0.05    |
|          | DWCRM <sup>1</sup>                       | 19.79                  | 52,896.16  | 0.41    |
|          | Clean-r-GQD                              | <LOD <sup>2</sup>      | 8,128.81   | 0.06    |
|          | Clean-GQD-NH <sub>2</sub> -H             | <LOD                   | 8,107.74   | 0.77    |
|          | Blank <sup>3</sup>                       | <0.000                 | 8,243.18   | 0.83    |
| GDL      | Calibration 0_0 ppb                      | 0.00                   | 14,274.1   | 4.30    |
|          | Calibration 1_1 ppb                      | 1.00                   | 29,838.2   | 0.50    |
|          | Calibration 5_5 ppb                      | 4.80                   | 93,850.6   | 1.60    |
|          | Calibration 10_10 ppb                    | 9.90                   | 180,071.5  | 0.80    |
|          | Calibration 25_25 ppb                    | 25.30                  | 438,635.4  | 0.00    |
|          | DWCRM                                    | 19.80                  | 76,923.4   | 1.10    |
|          | GDL-1                                    | 1,965.00               | 83,382.7   | 1.10    |
|          | GDL-2                                    | 1,892.00               | 87,535.4   | 0.50    |
|          | Blank                                    | 0.30                   | 12,528.3   | 0.20    |
| GDE      | Calibration 0_0 ppb                      | 0.04                   | 19,577.42  | 1.08    |
|          | Calibration 1_1 ppb                      | 0.93                   | 36,130.47  | 1.68    |
|          | Calibration 5_5 ppb                      | 4.96                   | 111,582.16 | 0.69    |
|          | Calibration 10_10 ppb                    | 10.08                  | 207,399.75 | 1.13    |
|          | Calibration 25_25 ppb                    | 24.62                  | 479,352.50 | 0.72    |
|          | DWCRM                                    | 20.61                  | 93,480.40  | 1.32    |
|          | Clean-r-GQD electrode-1                  | 5,498.81               | 223,846.66 | 1.87    |
|          | Clean-r-GQD electrode-2                  | 7,740.16               | 281,911.02 | 0.56    |
|          | Clean-GQD-NH <sub>2</sub> -H electrode-1 | 5,582.56               | 231,383.15 | 0.26    |
|          | Clean-GQD-NH <sub>2</sub> -H electrode-2 | 5,448.27               | 196,771.60 | 2.18    |
|          | Blank                                    | 1.25                   | 42,232.21  | 1.15    |

Note:

<sup>1</sup>: DWCRM is the drinking water certified reference material.

<sup>2</sup>: LOD means limit of detection.

<sup>3</sup>: The Blank is composed of 70% nitric acid and 30% H<sub>2</sub>O<sub>2</sub>.



**Supplementary Table 4.** The purity grade, suppliers, and Cu content of all the chemicals used in this work.

| <b>Chemical</b>  | <b>Supplier (grade)</b>                                                            | <b>Cu content (ppm/w)</b> |
|------------------|------------------------------------------------------------------------------------|---------------------------|
| KOH flakes       | Alfa (reagent grade, 90%)                                                          | 1.01                      |
| KOH pellets      | Sigma-Aldrich (semiconductor grade, 99.99% trace metals basis)                     | below detection limit     |
| Pyrene           | TCI (> 98%)                                                                        | below detection limit     |
| HNO <sub>3</sub> | Sinopharm Chemical Reagent (puriss. p.a., 65.0-68.0%)                              | 0.02                      |
| HNO <sub>3</sub> | Sigma-Aldrich (70%, purified by redistillation, $\geq$ 99.999% trace metals basis) | below detection limit     |
| NaOH             | Titansci Greagent (> 98%)                                                          | 0.44                      |
| NaOH             | Sigma-Aldrich (BioUltra, for luminescence, $\geq$ 98.0%)                           | below detection limit     |

---

**Supplementary Table 5.** Trace metal content in the clean-r-GQDs synthesized with high purity chemicals.

---

| <b>Metal</b> | <b>Content (ppm/w)</b> |
|--------------|------------------------|
| Fe           | 0.38                   |
| Co           | 0.11                   |
| Ni           | below detection limit  |
| Zn           | below detection limit  |
| Ag           | 0.05                   |
| Au           | below detection limit  |
| Pd           | below detection limit  |
| Cu           | below detection limit  |

---

**Supplementary Table 6.** Summary of the elemental state and atomic content in the studied GQD samples.

|                             | <b>C 1s</b><br><b>(at.%)</b> | <b>N 1s</b><br><b>(at.%)</b> | <b>Pyridinic N</b><br><b>(at.%)</b> | <b>Amine N</b><br><b>(at.%)</b> | <b>Pyrrolic</b><br><b>N (at.%)</b> | <b>Graphitic</b><br><b>N (at.%)</b> | <b>N oxide</b><br><b>(at.%)</b> | <b>O 1s</b><br><b>(at.%)</b> | <b>C=O</b><br><b>(at.%)</b> | <b>C-O</b><br><b>(at.%)</b> | <b>S 2p</b><br><b>(at.%)</b> | <b>-SO<sub>2</sub></b><br><b>(at.%)</b> | <b>-SO<sub>3</sub></b><br><b>(at.%)</b> |
|-----------------------------|------------------------------|------------------------------|-------------------------------------|---------------------------------|------------------------------------|-------------------------------------|---------------------------------|------------------------------|-----------------------------|-----------------------------|------------------------------|-----------------------------------------|-----------------------------------------|
| <b>p-GQD</b>                | <b>60.0</b>                  | <b>2.8</b>                   | 1.2                                 | 0                               | 1.6                                | 0                                   | 0                               | <b>37.2</b>                  | 27.3                        | 9.9                         | <b>0</b>                     | 0                                       | 0                                       |
| <b>r-GQD</b>                | <b>58.9</b>                  | <b>4.6</b>                   | 1.4                                 | 0                               | 2.5                                | 0.7                                 | 0                               | <b>36.5</b>                  | 5.7                         | 30.8                        | <b>0</b>                     | 0                                       | 0                                       |
| <b>o-GQD</b>                | <b>44.5</b>                  | <b>4</b>                     | 1.7                                 | 0                               | 2.3                                | 0                                   | 0                               | <b>51.5</b>                  | 45.1                        | 6.4                         |                              |                                         |                                         |
| <b>ro-GQD</b>               | <b>58.1</b>                  | <b>6.3</b>                   | 1.6                                 | 0                               | 4.7                                | 0                                   | 0                               | <b>35.6</b>                  | 10.0                        | 25.6                        | <b>0</b>                     | 0                                       | 0                                       |
| <b>GQD-NH<sub>2</sub>-L</b> | <b>56.3</b>                  | <b>18.6</b>                  | 1.3                                 | 3.9                             | 1.5                                | 9.2                                 | 2.8                             | <b>25.1</b>                  | 22.4                        | 2.7                         | <b>0</b>                     | 0                                       | 0                                       |
| <b>GQD-NH<sub>2</sub>-H</b> | <b>62.7</b>                  | <b>28.5</b>                  | 3.0                                 | 8.0                             | 6.7                                | 6.4                                 | 4.4                             | <b>8.8</b>                   | 6.1                         | 2.7                         | <b>0</b>                     | 0                                       | 0                                       |
| <b>GQD-SO<sub>3</sub></b>   | <b>40.2</b>                  | <b>4.9</b>                   | 1.5                                 | 2.7                             | 0.7                                | 0                                   | 0                               | <b>43.9</b>                  | /                           | 0                           | <b>10.9</b>                  | 2.3                                     | 8.6                                     |

**Supplementary Table 7.** The \*CO adsorption energy at the pyridinic N site on modeled GQD substrates with various functional groups, functional group densities, defects, and N-dopants.

|                                                                  | <b>E<sub>a</sub> (*CO) on pyridinic N site / eV</b> |
|------------------------------------------------------------------|-----------------------------------------------------|
| Blank GQD                                                        | -0.070                                              |
| GQD-COOH                                                         | -0.070                                              |
| GQD-NH <sub>2</sub>                                              | -0.090                                              |
| GQD-OH                                                           | -0.090                                              |
| GQD-NH <sub>2</sub> (two -NH <sub>2</sub> <b>Figure S43b</b> )   | -0.357                                              |
| GQD-NH <sub>2</sub> (two -NH <sub>2</sub> <b>Figure S43c</b> )   | -0.125                                              |
| GQD-NH <sub>2</sub> (two -NH <sub>2</sub> <b>Figure S43d</b> )   | -0.146                                              |
| GQD-NH <sub>2</sub> (two -NH <sub>2</sub> <b>Figure S43e</b> )   | -0.218                                              |
| GQD-NH <sub>2</sub> (three -NH <sub>2</sub> <b>Figure S43f</b> ) | -0.170                                              |
| GQD-NH <sub>2</sub> (three -NH <sub>2</sub> <b>Figure S43g</b> ) | -0.304                                              |
| GQD-NH <sub>2</sub> (three -NH <sub>2</sub> <b>Figure S43h</b> ) | -0.197                                              |
| GQD-NH <sub>2</sub> (three -NH <sub>2</sub> <b>Figure S43i</b> ) | -0.327                                              |
| GQD-NH <sub>2</sub> (defect <b>Figure S43j</b> )                 | -0.107                                              |
| GQD-NH <sub>2</sub> (defect <b>Figure S43k</b> )                 | -0.204                                              |
| GQD-NH <sub>2</sub> (two N-dopants <b>Figure S43l</b> )          | -0.076                                              |
| GQD-NH <sub>2</sub> (two N-dopants <b>Figure S43m</b> )          | -0.100                                              |
| GQD-NH <sub>2</sub> (two N-dopants <b>Figure S43n</b> )          | -0.085                                              |
| GQD-NH <sub>2</sub> (with 7e <sup>-</sup> <b>Figure S44</b> )    | -0.980                                              |

---

## Supplementary Note 1

### Mass balance.

The carbon mass equivalent balance was calculated according to the following equation:

$$M_i = \frac{\sum j_i \times A \times t}{n_i \times F} \times n \times M_C \quad (1)$$

$$M_{total} = \sum M_i \quad (2)$$

where  $M_i$  represents the carbon mass equivalent corresponding to a product species  $i$ ;  $\sum j_i$  represents the sum of all partial current densities toward species  $i$  under all applied potentials;  $A$  is the geometric electrode area;  $t$  represents the test duration of each applied potential;  $n_i$  represents the number of electron transfer for the formation of species  $i$ ;  $n$  is the number of carbon in species  $i$ ;  $F$  represents the Faradaic constant;  $M_C$  represents the molecular weight of C.

Regarding the CO<sub>2</sub> reduction testing for r-GQDs, each potential was tested for 5 minutes. See Supplementary Table 5 for the equivalent carbon mass obtained for each potential and each product. The total weight of the applied GQDs catalyst (0.3 mg) was determined by calculating the weight difference of the electrode before and after coating the catalyst. In that way, the total equivalent carbon mass of CO<sub>2</sub> reduction products for r-GQDs is calculated to be 4.57 mg, which is 15.3 times the mass of the GQDs catalyst (0.3 mg).

---

## Supplementary Note 2

### DFT calculation.

In this work, the effect of active sites, and the type and number of functional groups on the performance of the electrocatalytic CO<sub>2</sub> reduction reaction (CO<sub>2</sub>RR) were considered. The reaction mechanisms for CO<sub>2</sub>RR can be described as below.<sup>15</sup>

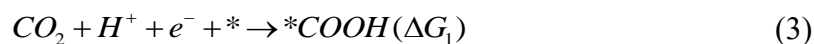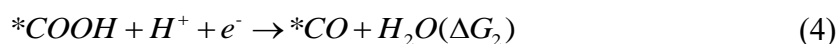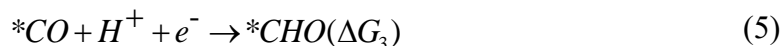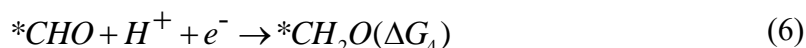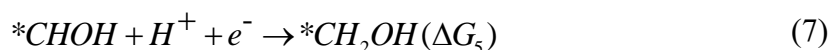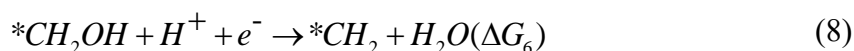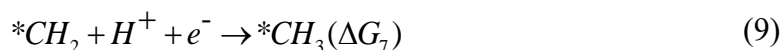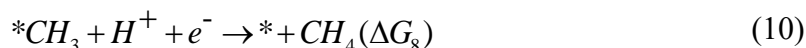

where \* represents the catalyst surface. For each reaction, the Gibbs free energy is given by

$$G = E_{total} + E_{ZPE} + \int C_p dT - TS \quad (11)$$

where  $E_{total}$  is the total energy,  $E_{ZPE}$  is the zero-point energy,  $C_p$  is the heat capacity,  $T = 298.15\text{K}$  is the temperature and  $S$  is the entropy. In addition, the Gibbs free energy of  $\text{H}^+$  is to be half that of  $\text{H}_2$ .<sup>16</sup> According to previous literature, the stabilization energy of \*COOH and \*CO due to the solvation effect are 0.25 and 0.1 eV, respectively.<sup>17</sup> In order to eliminate the error caused by the PBE exchange-correlation functional, a correction of -0.51 eV was set for the CO molecule.<sup>17</sup> The binding energy ( $E_b$ ) of some adsorbates on the catalyst surface has also been considered. The  $E_b$  is given by

$$E_b = E_{total} - E_a - E_s \quad (12)$$

Where  $E_{total}$ ,  $E_a$  and  $E_s$  is the total energy of the system, the energy of the adsorbate, and the energy of the catalyst surface, respectively.

---

### Supplementary References:

1. Li Y, Cui F, Ross MB, Kim D, Sun Y, Yang P. Structure-sensitive CO<sub>2</sub> electroreduction to hydrocarbons on ultrathin 5-fold twinned copper nanowires. *Nano Lett.* **17**, 1312-1317 (2017).
2. Chen S, Su Y, Deng P, Qi R, Zhu J, Chen J, *et al.* Highly selective carbon dioxide electroreduction on structure-evolved copper perovskite oxide toward methane production. *ACS Catal.* **10**, 4640-4646 (2020).
3. Wang Z, Yuan Q, Shan J, Jiang Z, Xu P, Hu Y, *et al.* Highly selective electrocatalytic reduction of CO<sub>2</sub> into methane on Cu-Bi nanoalloys. *J. Phys. Chem. Lett.* **11**, 7261-7266 (2020).
4. Zhang T, Verma S, Kim S, Fister TT, Kenis PJA, Gewirth AA. Highly dispersed, single-site copper catalysts for the electroreduction of CO<sub>2</sub> to methane. *J. Electroanal. Chem.* **875**, 113862 (2020).
5. Lin L, Liu T, Xiao J, Li H, Wei P, Gao D, *et al.* Enhancing CO<sub>2</sub> electroreduction to methane with cobalt phthalocyanine and zinc-nitrogen-carbon tandem catalyst. *Angew. Chem. Int. Ed.* **59**, 22408-22413 (2020).
6. Kim MK, Kim HJ, Lim H, Kwon Y, Jeong HM. Metal-organic framework-mediated strategy for enhanced methane production on copper nanoparticles in electrochemical CO<sub>2</sub> reduction. *Electrochim. Acta*, **306**, 28-34 (2019).
7. Wang X, Xu A, Li F, Hung SF, Nam DH, Gabardo CM, *et al.* Efficient methane electrosynthesis enabled by tuning local CO<sub>2</sub> availability. *J. Am. Chem. Soc.* **142**, 3525-3531 (2020).
8. Liu H, Xiang K, Liu Y, Zhu F, Zou M, Yan X, *et al.* Polydopamine functionalized Cu nanowires for enhanced CO<sub>2</sub> electroreduction towards methane. *ChemElectroChem*, **5**, 3991-3999 (2018).
9. Rong W, Zou H, Zang W, Xi S, Wei S, Long B, *et al.* Size-dependent activity and selectivity of atomic-level Cu nanoclusters during CO/CO<sub>2</sub> electroreduction. *Angew. Chem. Int. Ed.* **60**, 466-472 (2020).
10. Han L, Song S, Liu M, Yao S, Liang Z, Cheng H, *et al.* Stable and efficient single-atom Zn catalyst for CO<sub>2</sub> reduction to CH<sub>4</sub>. *J. Am. Chem. Soc.* **142**, 12563-12567 (2020).
11. Sun X, Kang X, Zhu Q, Ma J, Yang G, Liu Z, *et al.* Very highly efficient reduction of CO<sub>2</sub> to CH<sub>4</sub> using metal-free N-doped carbon electrodes. *Chem. Sci.* **7**, 2883-2887 (2016).
12. Lum Y, Kwon Y, Lobaccaro P, Chen L, Clark EL, Bell AT, *et al.* Trace levels of copper in carbon materials show significant electrochemical CO<sub>2</sub> reduction activity. *ACS Catal.* **6**, 202-209 (2016).
13. Cai Y, Fu J, Zhou Y, Chang YC, Min Q, Zhu JJ, *et al.* Insights on forming N,O-coordinated Cu single-atom catalysts for electrochemical reduction CO<sub>2</sub> to methane. *Nat. Commun.* **12**, 586 (2021).
14. Zhang L, Li XX, Lang ZL, Liu Y, Liu J, Yuan L, *et al.* Enhanced cuprophilic interactions in crystalline catalysts facilitate the highly selective

- 
- electroreduction of CO<sub>2</sub> to CH<sub>4</sub>. *J. Am. Chem. Soc.* (2021).
15. Zou X, Liu M, Wu J, Ajayan PM, Li J, Liu B, *et al.* How nitrogen-doped graphene quantum dots catalyze electroreduction of CO<sub>2</sub> to hydrocarbons and oxygenates. *ACS Catal.* **7**, 6245-6250 (2017).
  16. Wang Y, Chen J, Wang G, Li Y, Wen Z. Perfluorinated covalent triazine framework derived hybrids for the highly selective electroconversion of carbon dioxide into methane. *Angew. Chem. Int. Ed.* **57**, 13120-13124 (2018).
  17. Pérez-Rodríguez S, Barreras F, Pastor E, Lázaro MJ. Electrochemical reactors for CO<sub>2</sub> reduction: from acid media to gas phase. *Int. J. Hydrogen Energy*, **41**, 19756-19765 (2016).
